# Supplementary material for: Design, synthesis, and exploration of antibacterial activity of 6H-1,2-oxazin-6-ones
Source: Royal Society of Chemistry journal article supplement (doi:10.1039/d4ra04220d), 2024-01-01
Supplement: d4ra04220d1.pdf [file d4ra04220d1.pdf]

## Supplementary Information

# Design, Synthesis and Exploration of Antibacterial Activity of 6*H*-1,2-oxazin-6- ones

Eleazar Alcántar-Zavala,<sup>a</sup> Francisco Delgado-Vargas,<sup>b</sup> Fabricio Marín-González,<sup>a</sup> Gabriela López Angulo,<sup>a</sup> Hugo Enrique Aguirre-Madrigal,<sup>b</sup> Adrián Ochoa-Terán,<sup>c</sup> Gibrán Rodríguez-Vega,<sup>d</sup> Gerardo Aguirre-Hernández,<sup>c</sup> Julio Montes-Avila<sup>\*b</sup>

<sup>a</sup>Facultad de Ciencias Químico-Biológicas, Universidad Autónoma de Sinaloa, Culiacán, Sinaloa, 80010 México

<sup>b</sup>Programa de Posgrado en Ciencias Biomédicas, Facultad de Ciencias Químico-Biológicas, Universidad Autónoma de Sinaloa, Culiacán, Sinaloa, 80010 México. E-mail: [jmontes@uas.edu.mx](mailto:jmontes@uas.edu.mx)

<sup>c</sup>Centro de Graduados e Investigación en Química, Tecnológico Nacional de México/Instituto Tecnológico de Tijuana, Tijuana, Baja California, 22444 México

<sup>d</sup>Unidad Académica de Ciencias Químico-Biológicas y Farmacéuticas, Universidad Autónoma de Nayarit, Tepic, Nayarit, 63155 México

**Table S1.** Docking scores of designed oxazinones with DHFR enzyme and the PTC.

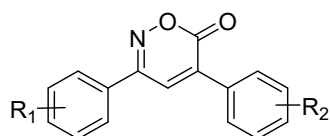

| Oxazinones   | R <sub>1</sub>    | R <sub>2</sub> | DHFR                             | PTC                              |
|--------------|-------------------|----------------|----------------------------------|----------------------------------|
|              |                   |                | Score ( $\Delta G$ , kcal / mol) | Score ( $\Delta G$ , kcal / mol) |
| 16           | 4-OH              | 4-OH           | -8.5                             | -8.2                             |
| 17           | -H                | 4-OH           | -8.5                             | -8.2                             |
| 18           | 4-OH              | -H             | -8.5                             | -8.1                             |
| 19           | 3-OH              | -H             | -8.4                             | -8.4                             |
| 20           | 3-OH              | 3-OH           | -8.3                             | -8.7                             |
| 21           | 4-OH              | 3,4-diOH       | -8.5                             | -8.8                             |
| 22           | 4-OH              | 4-OMe          | -8.6                             | -8.7                             |
| 23           | 4-OMe             | 4-OMe          | -8.6                             | -8.5                             |
| 24           | 4-NH <sub>2</sub> | 4-OMe          | -8.6                             | -8.3                             |
| 25           | 4-NH <sub>2</sub> | 2-Cl           | -8.1                             | -7.9                             |
| 26           | 4-NH <sub>2</sub> | 4-OH           | -8.5                             | -8.3                             |
| 27           | 4-OH              | 2-Cl           | -8.5                             | -7.9                             |
| 28           | 4-NH <sub>2</sub> | 2-F            | -8.6                             | -8.1                             |
| 29           | 3-OH              | 4-Me           | -8.7                             | -8.6                             |
| 30           | 4-OH              | 4-Me           | -8.9                             | -8.4                             |
| Linezolid    |                   |                |                                  | -8.9                             |
| Trimethoprim |                   |                | -6.7                             |                                  |

**Table S2.** Prediction of the pharmacokinetic parameters (ADME properties) of the 6*H*-

| Oxazinones | MW     | NHA | NHD | NRB | TPSA  | LogP | LogS  | SW       | Ro5 |
|------------|--------|-----|-----|-----|-------|------|-------|----------|-----|
| <b>1</b>   | 297,74 | 3   | 0   | 2   | 43,1  | 4,11 | -5    | 2,99E-03 | 0   |
| <b>2</b>   | 263,29 | 3   | 0   | 2   | 43,1  | 3,59 | -4,42 | 1,00E-02 | 0   |
| <b>3</b>   | 318,15 | 3   | 0   | 2   | 43,1  | 4,31 | -5,29 | 1,61E-03 | 0   |
| <b>4</b>   | 297,74 | 3   | 0   | 2   | 43,1  | 4,12 | -5    | 2,99E-03 | 0   |
| <b>5</b>   | 283,71 | 3   | 0   | 2   | 43,1  | 3,78 | -4,72 | 5,46E-03 | 0   |
| <b>6</b>   | 277,32 | 3   | 0   | 2   | 43,1  | 3,92 | -4,71 | 5,44E-03 | 0   |
| <b>7</b>   | 293,32 | 4   | 0   | 3   | 52,33 | 3,57 | -4,47 | 1,00E-02 | 0   |
| <b>8</b>   | 293,32 | 4   | 0   | 3   | 52,33 | 3,58 | -4,47 | 1,00E-02 | 0   |
| <b>9</b>   | 313,74 | 4   | 0   | 3   | 52,33 | 3,76 | -4,76 | 5,49E-03 | 0   |
| <b>10</b>  | 313,74 | 4   | 0   | 3   | 52,33 | 3,76 | -4,76 | 5,49E-03 | 0   |
| <b>11</b>  | 297,74 | 3   | 0   | 2   | 43,1  | 4,12 | -5    | 2,99E-03 | 0   |
| <b>12</b>  | 318,15 | 3   | 0   | 2   | 43,1  | 4,31 | -5,29 | 1,61E-03 | 0   |
| <b>13</b>  | 293,32 | 4   | 0   | 3   | 52,33 | 3,57 | -4,47 | 1,00E-02 | 0   |
| <b>14</b>  | 313,74 | 4   | 0   | 3   | 52,33 | 3,78 | -4,76 | 5,49E-03 | 0   |
| <b>15</b>  | 293,32 | 4   | 0   | 3   | 52,33 | 4,11 | -5    | 2,99E-03 | 0   |

1,2-oxazin-6-ones selected for docking studies.

MW is the molecular weight (g/mol), NHA is the number of hydrogen bond acceptors, NHD is the number of hydrogen bond donors, NRB is the number of rotatable bonds, TPSA is the topological polar surface area, cLogP is the logarithm of the octanol/water partition coefficient, LogS is the logarithm of the solubility in water, SW solubility in water (mg/mL), Ro5 is Lipinski's rule of five.

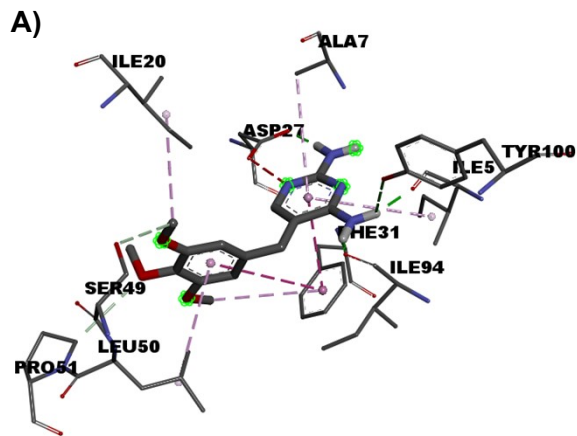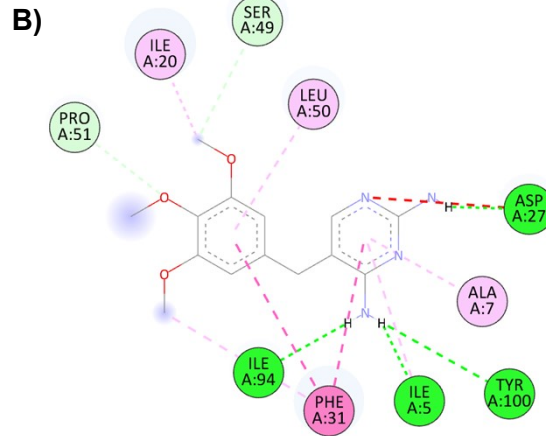

A) *ire S1*. A) Trimethoprim in the DHFR binding site; B) 2D map of the Trimethoprim ligand in the binding site.

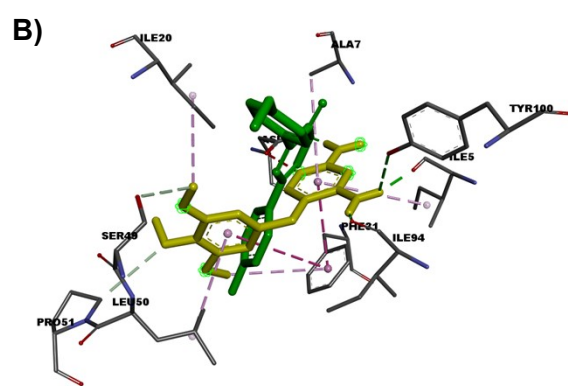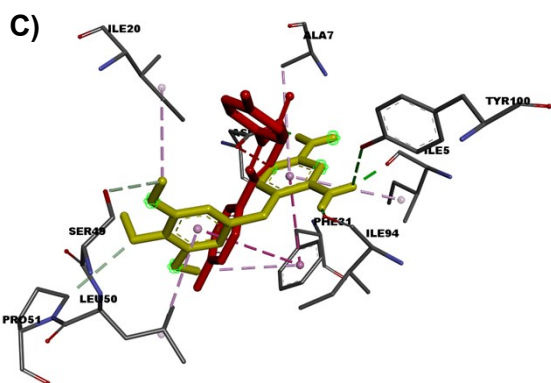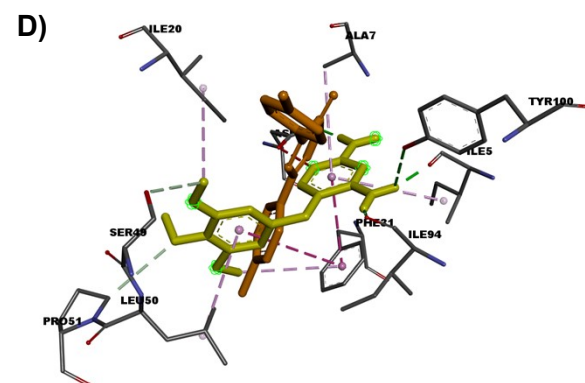

Figure S2. A) Trimethoprim (yellow) in the binding site of the DHFR enzyme and

oxazinones **B**) **6** (green), **C**) **8** (red) and **D**) **3** (orange) superimposed.

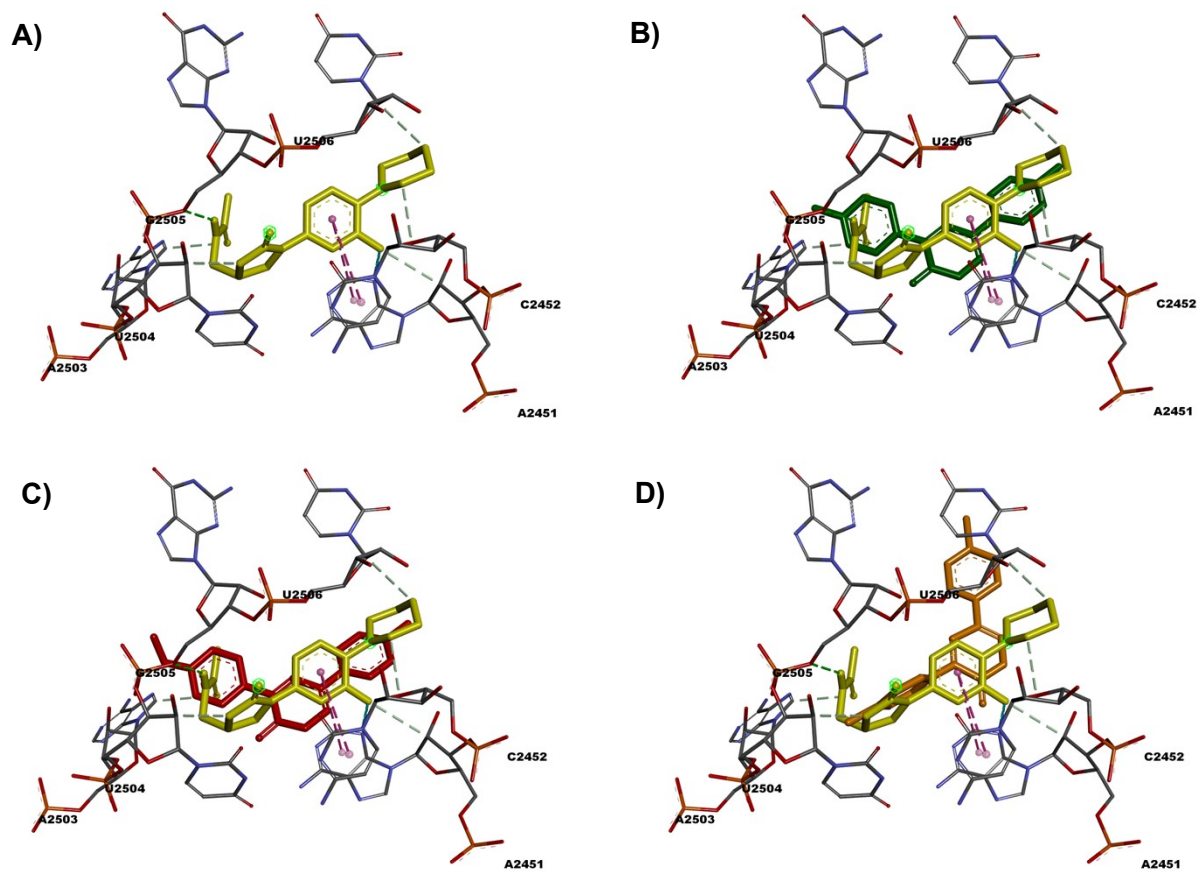

**Figure S3.** A) Linezolid (yellow) in the binding site of the SFT and oxazinones **B)** 6 (green), **C)** 8 (red) and **D)** 3 (orange) superimposed.

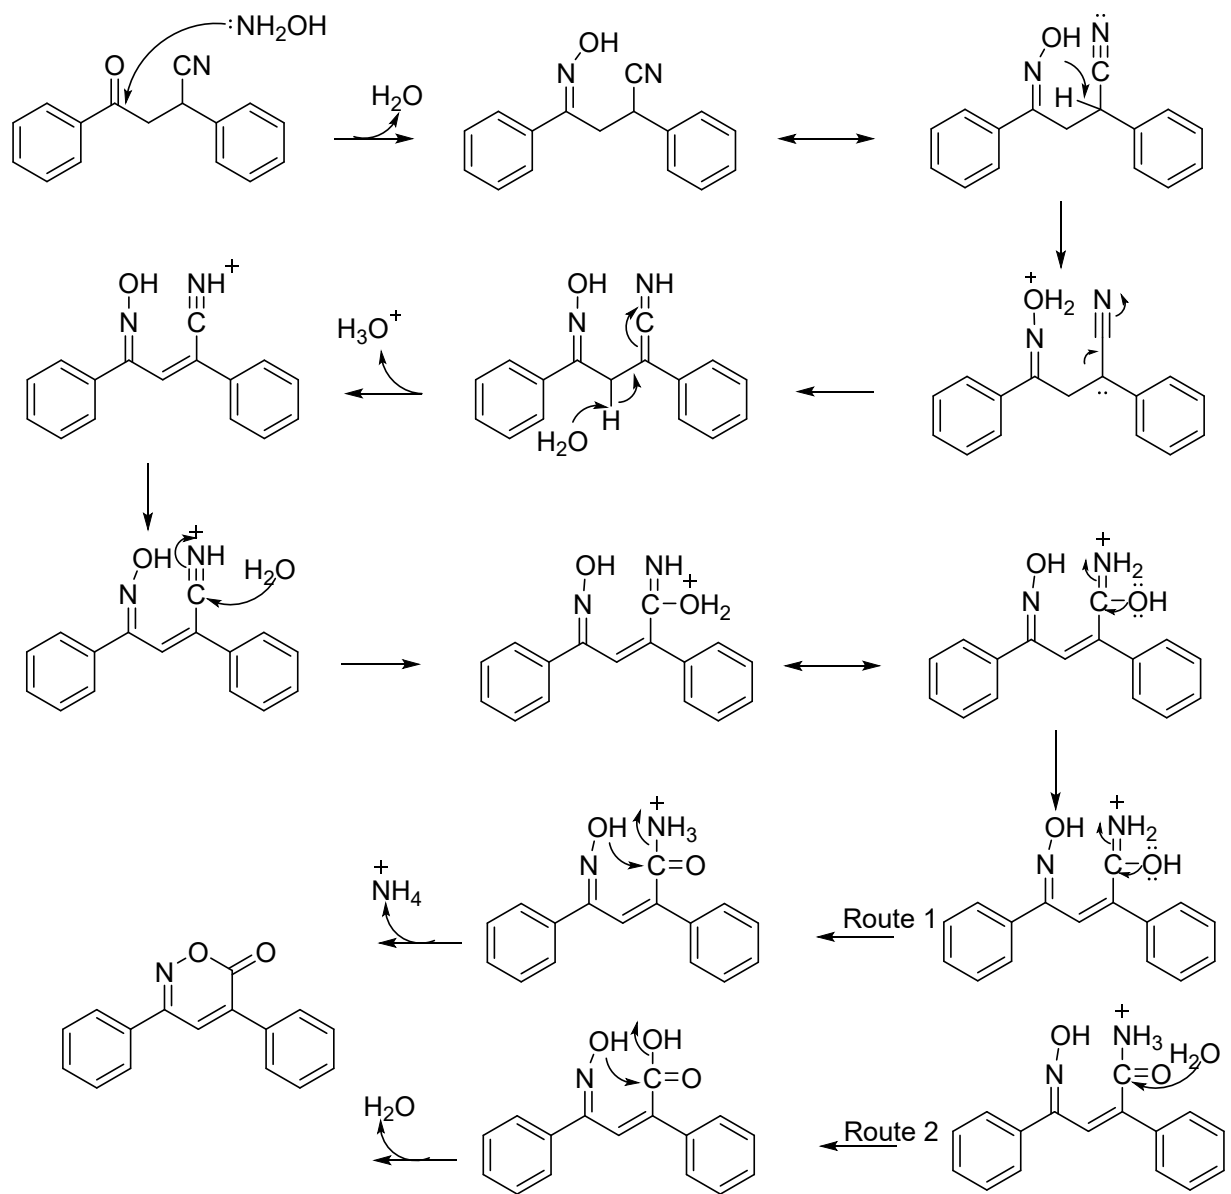

**Scheme 1S.** Proposed mechanism for the synthesis of 6*H*-1,2-oxazin-6-ones from  $\beta$ -cyanoketones.

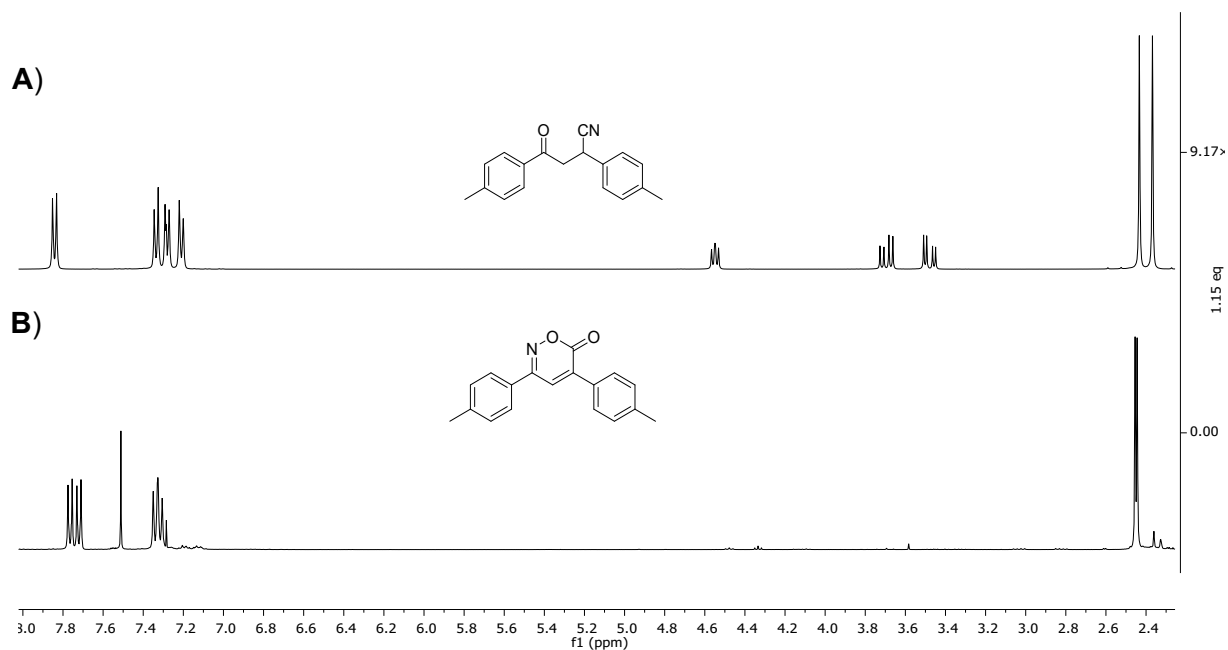

**Figure S4.** Partial  $^1\text{H-NMR}$  spectra of  $\beta$ -cyanoketones precursor (**A**) and **6** (**B**).

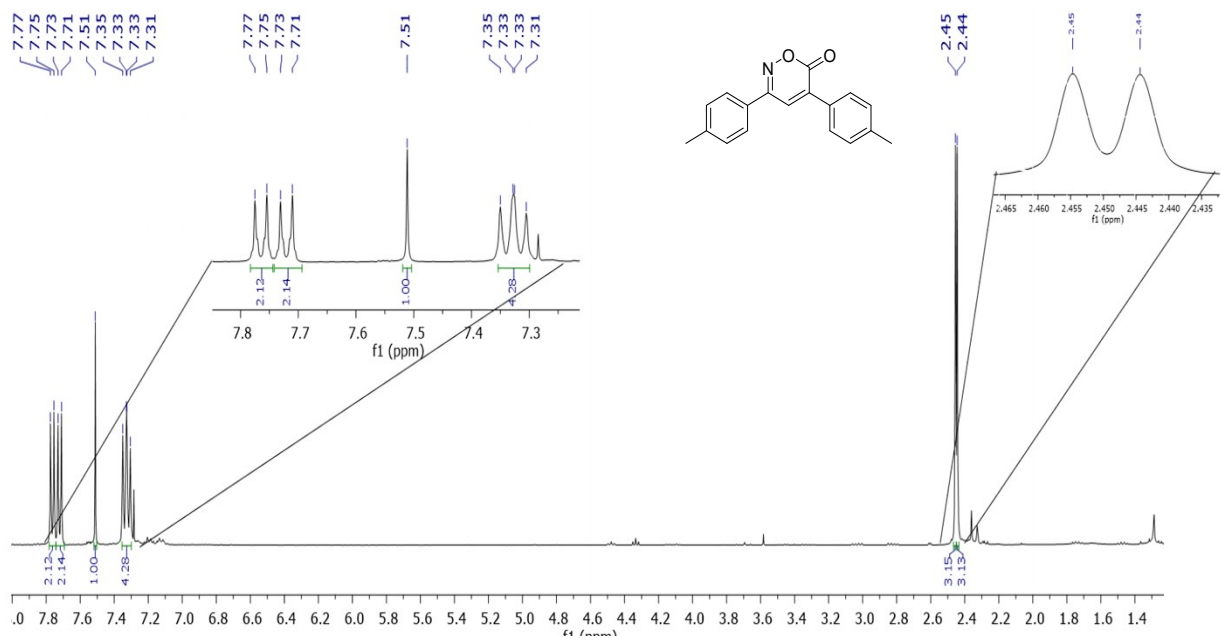

**Figure S5.**  $^1\text{H-NMR}$  spectrum of **6** in  $\text{CDCl}_3$ .



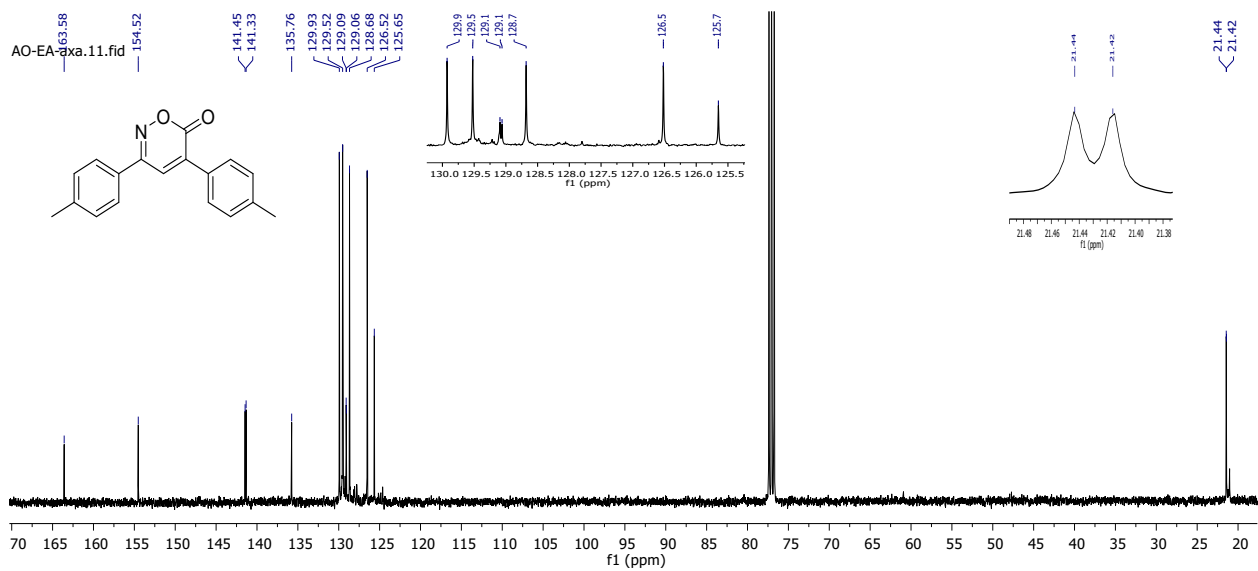

Figure S6.  $^{13}\text{C}$ -NMR spectrum of **6** in  $\text{CDCl}_3$ .

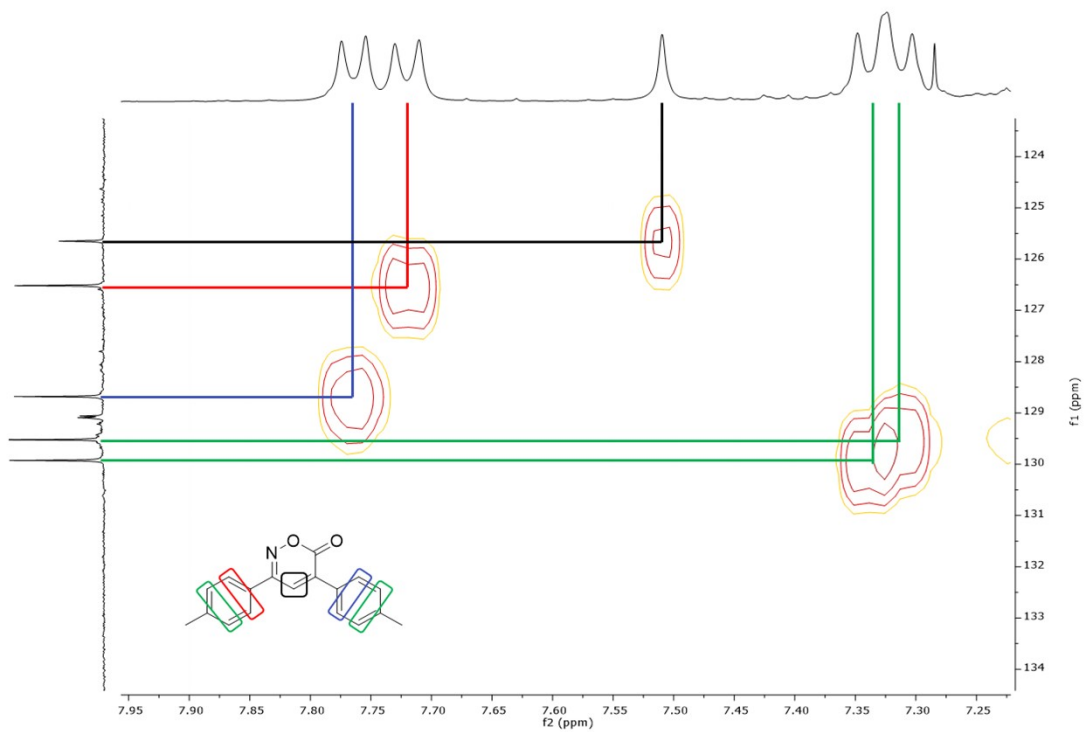

Figure S7. HSQC spectrum of **6**.

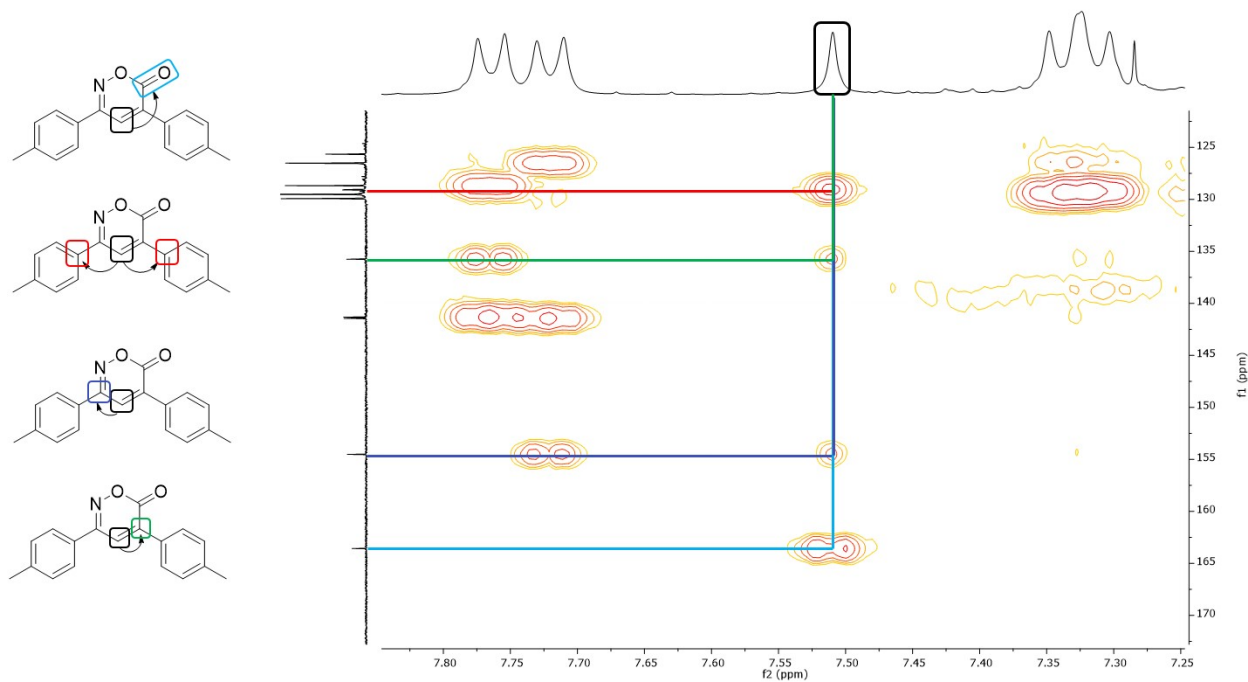

**Figure S8.** HMBC spectrum of **6** (part 1).

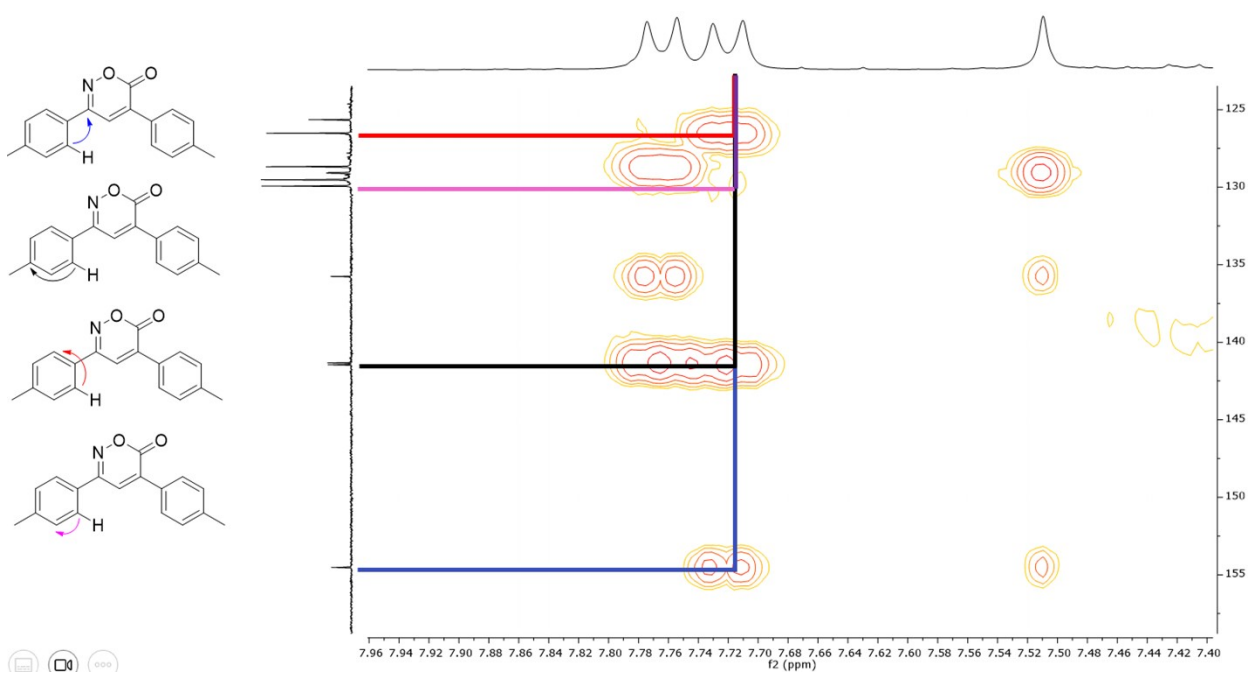

**Figure S9.** HMBC spectrum of **6** (part 2).

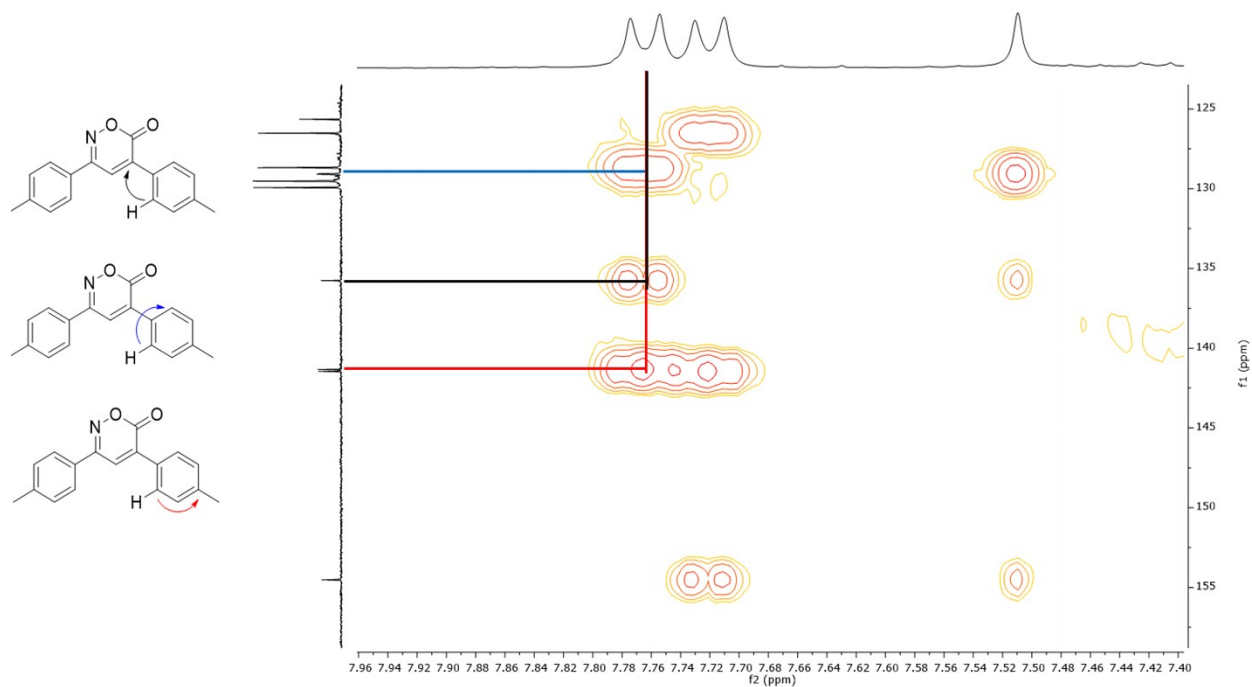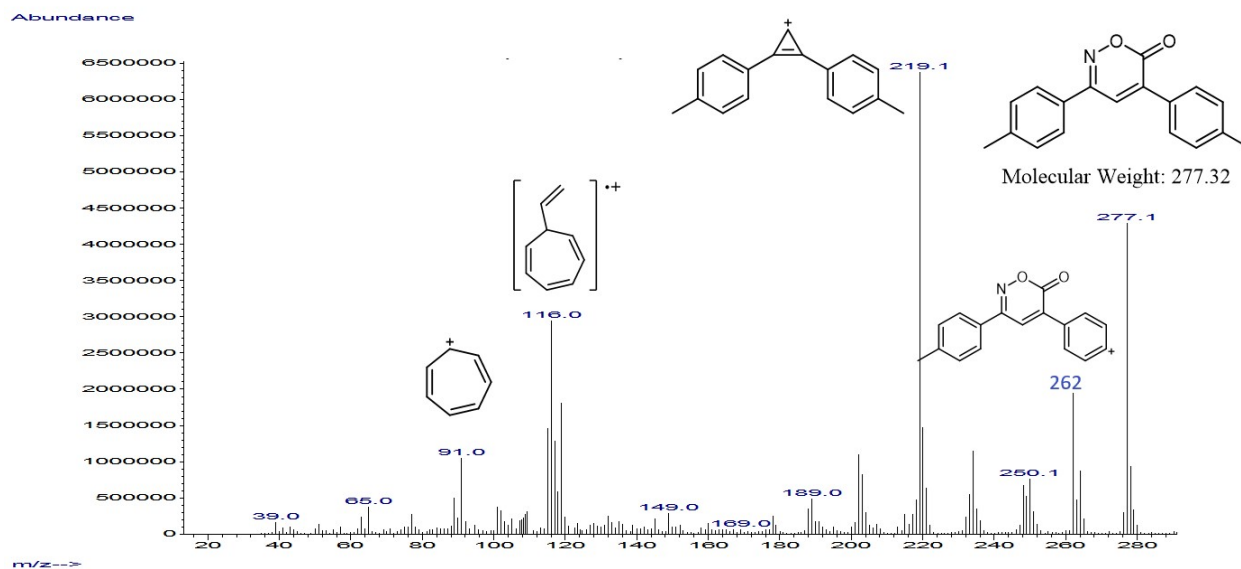

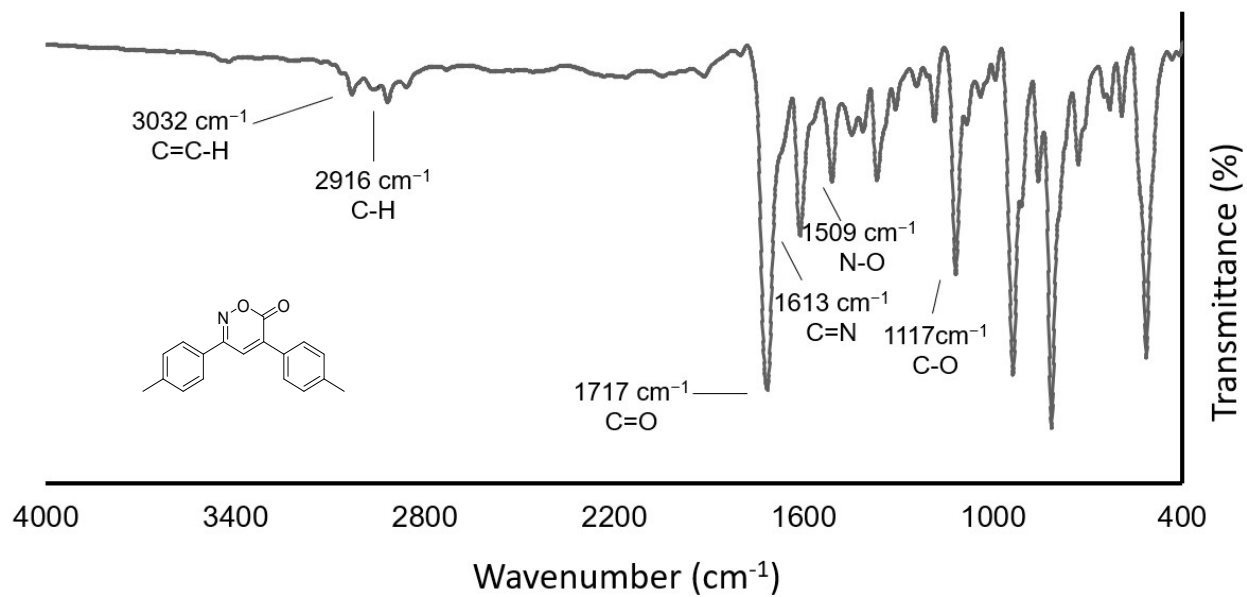

**Figure S12.** FT-IR of 6.

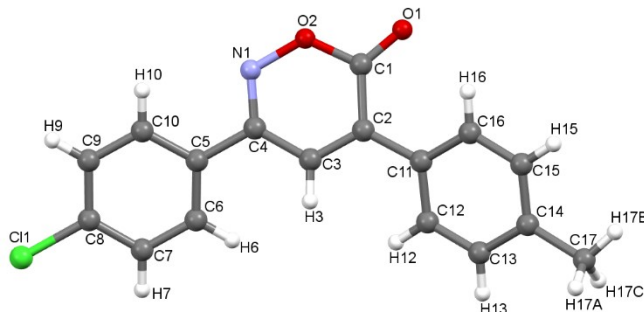

**Table S3.** Crystal data and structure refinement for EA-20000.

|                                             |                                                               |
|---------------------------------------------|---------------------------------------------------------------|
| Identification code                         | <b>6H-1,2-oxazin-6-ones (1)</b>                               |
| Empirical formula                           | C <sub>17</sub> H <sub>12</sub> ClNO <sub>2</sub>             |
| Formula weight                              | 297.73                                                        |
| Temperature/K                               | 294.1(4)                                                      |
| Crystal system                              | monoclinic                                                    |
| Space group                                 | P2 <sub>1</sub> /c                                            |
| a/Å                                         | 6.54533(13)                                                   |
| b/Å                                         | 29.5464(5)                                                    |
| c/Å                                         | 7.4552(2)                                                     |
| α/°                                         | 90                                                            |
| β/°                                         | 101.691(2)                                                    |
| γ/°                                         | 90                                                            |
| Volume/Å <sup>3</sup>                       | 1411.85(5)                                                    |
| Z                                           | 4                                                             |
| ρ <sub>calc</sub> /g/cm <sup>3</sup>        | 1.401                                                         |
| μ/mm <sup>-1</sup>                          | 2.424                                                         |
| F(000)                                      | 616.0                                                         |
| Crystal size/mm <sup>3</sup>                | 0.183 × 0.067 × 0.054                                         |
| Radiation                                   | CuKα (λ = 1.54184)                                            |
| 2θ range for data collection/°              | 5.982 to 141.54                                               |
| Index ranges                                | -8 ≤ h ≤ 8, -35 ≤ k ≤ 36, -8 ≤ l ≤ 8                          |
| Reflections collected                       | 18218                                                         |
| Independent reflections                     | 2676 [R <sub>int</sub> = 0.0423, R <sub>sigma</sub> = 0.0213] |
| Data/restraints/parameters                  | 2676/0/191                                                    |
| Goodness-of-fit on F <sup>2</sup>           | 1.036                                                         |
| Final R indexes [I ≥ 2σ (I)]                | R <sub>1</sub> = 0.0451, wR <sub>2</sub> = 0.1197             |
| Final R indexes [all data]                  | R <sub>1</sub> = 0.0554, wR <sub>2</sub> = 0.1273             |
| Largest diff. peak/hole / e Å <sup>-3</sup> | 0.21/-0.21                                                    |

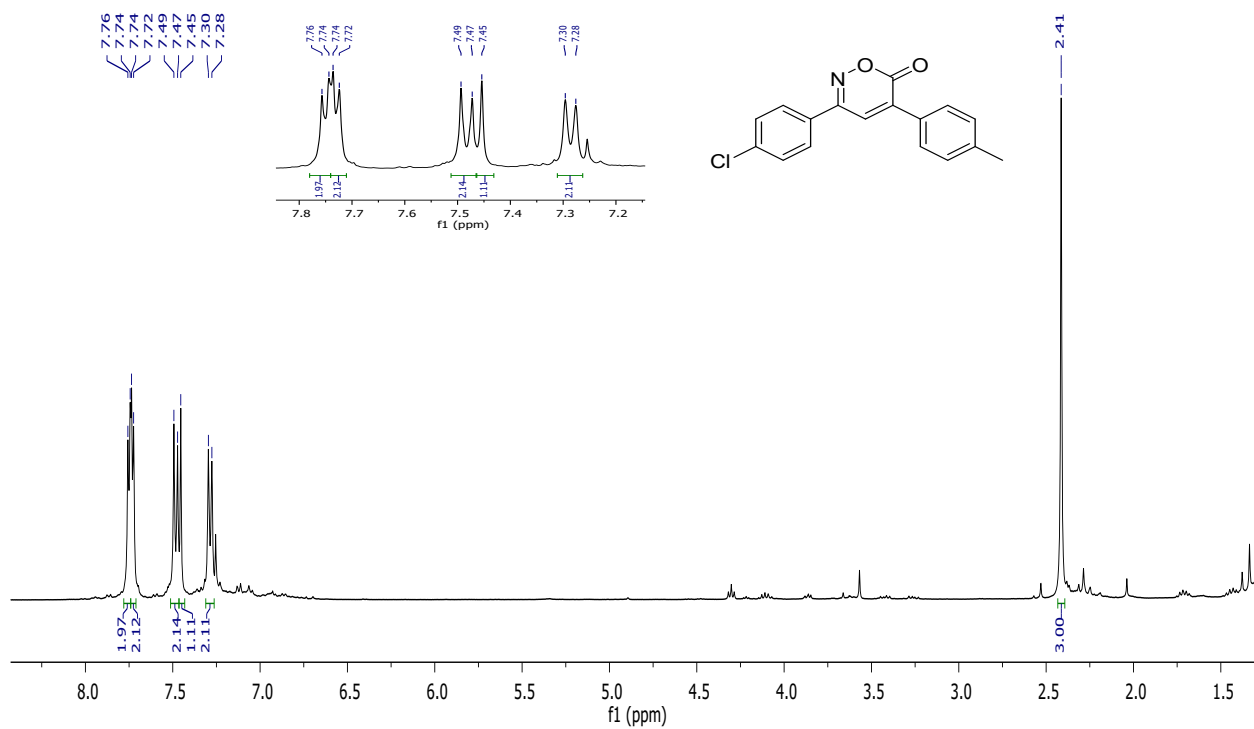

Figure S13. <sup>1</sup>H-NMR spectrum of **1** in CDCl<sub>3</sub>.

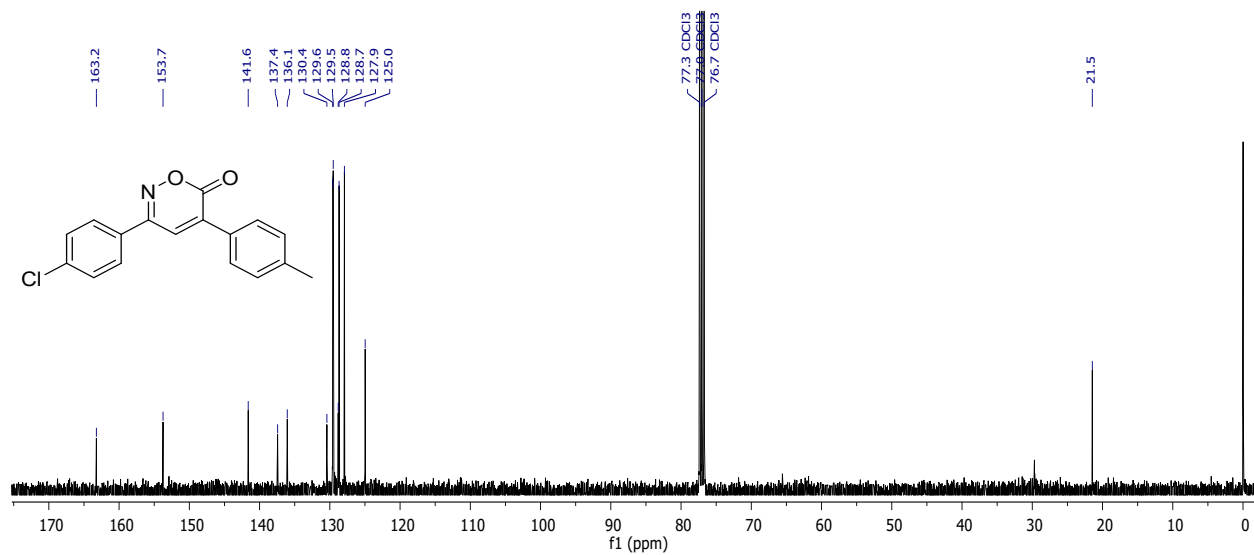

Figure S14. <sup>13</sup>C-NMR spectrum of **1** in CDCl<sub>3</sub>.

Abundance

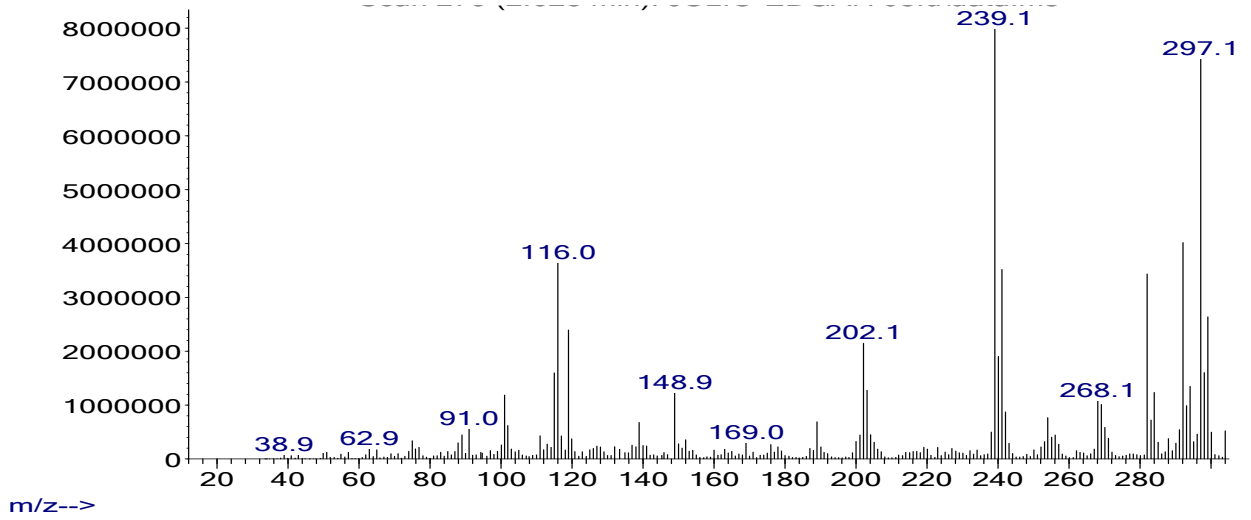

Figure S15. MS(IE) of 1.

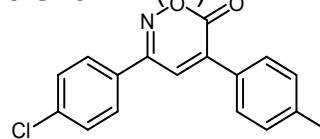

Molecular Weight: 297.74

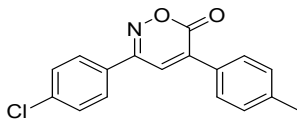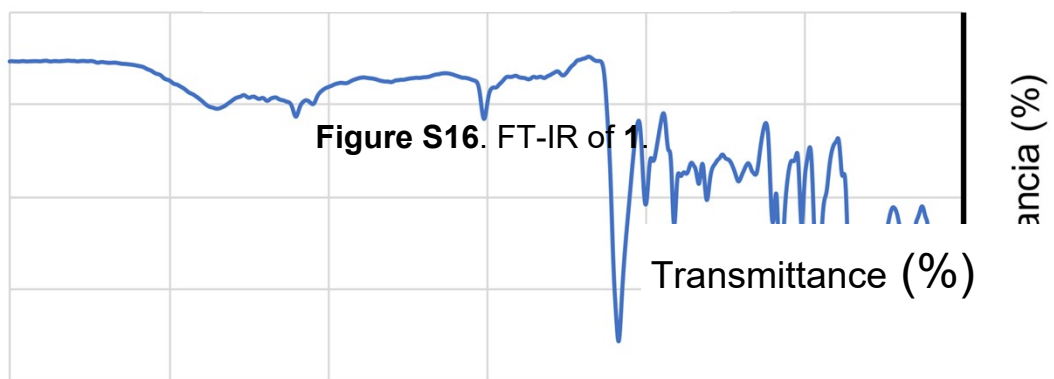

Figure S16. FT-IR of 1.

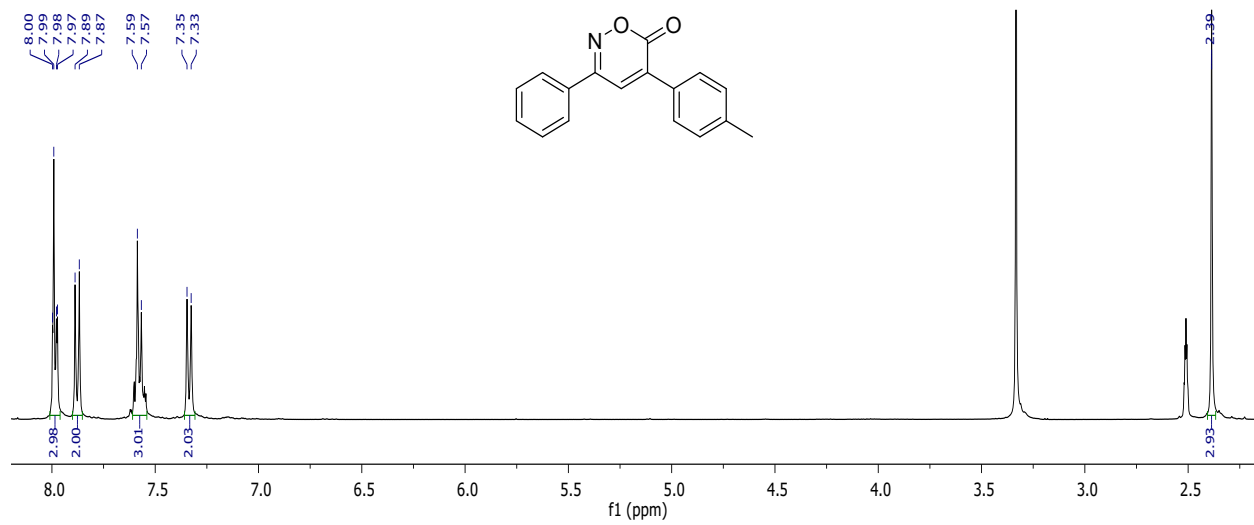

Figure S17. <sup>1</sup>H-NMR spectrum of 2 in DMSO-*d*<sub>6</sub>.

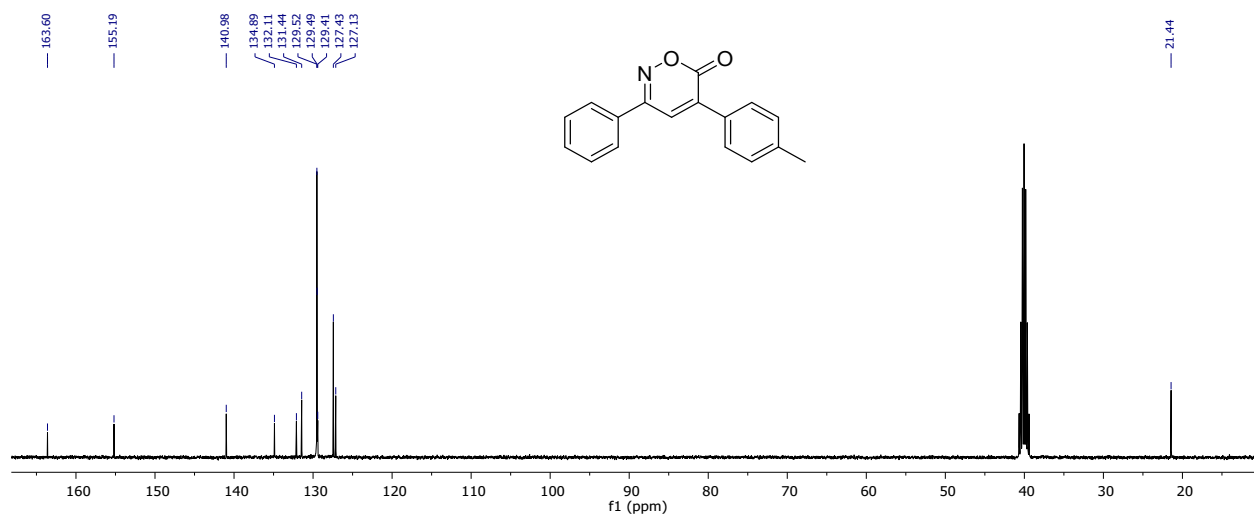

Figure S18. <sup>13</sup>C-NMR spectrum of 2 in DMSO-*d*<sub>6</sub>.



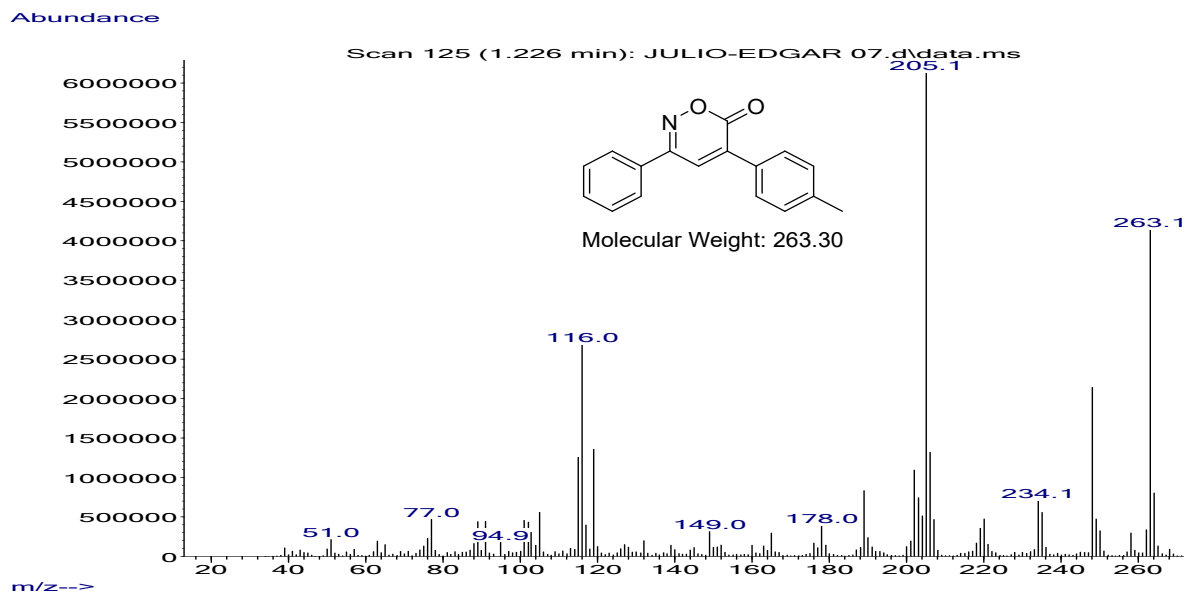

Figure S19. MS(IE) of 2.

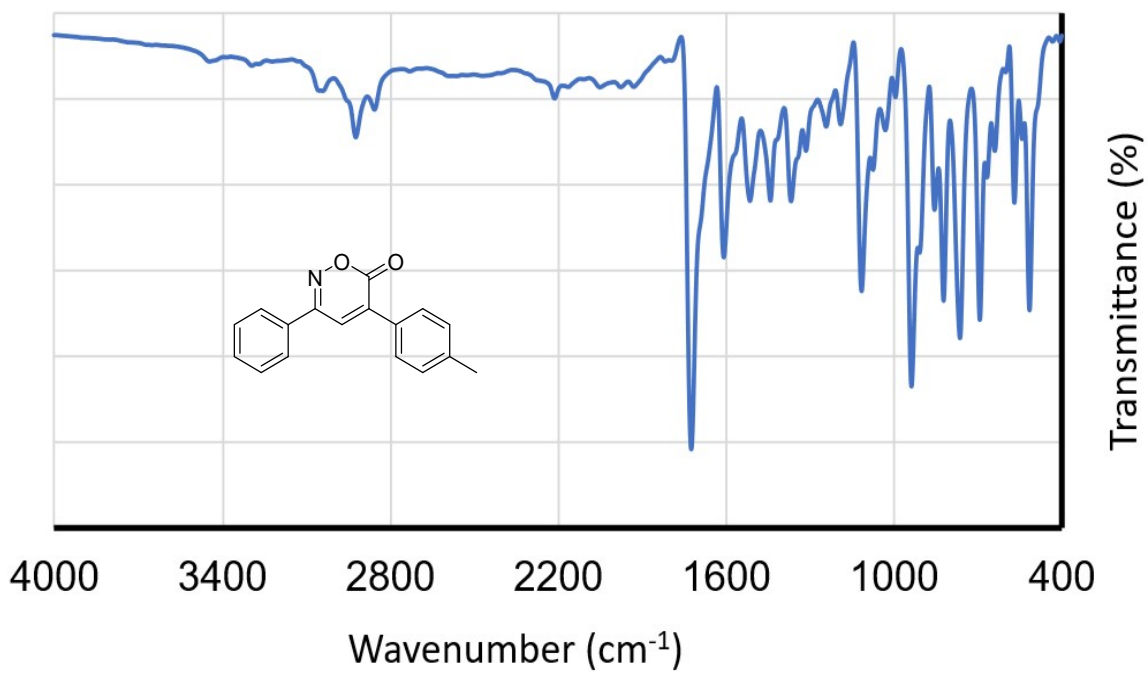



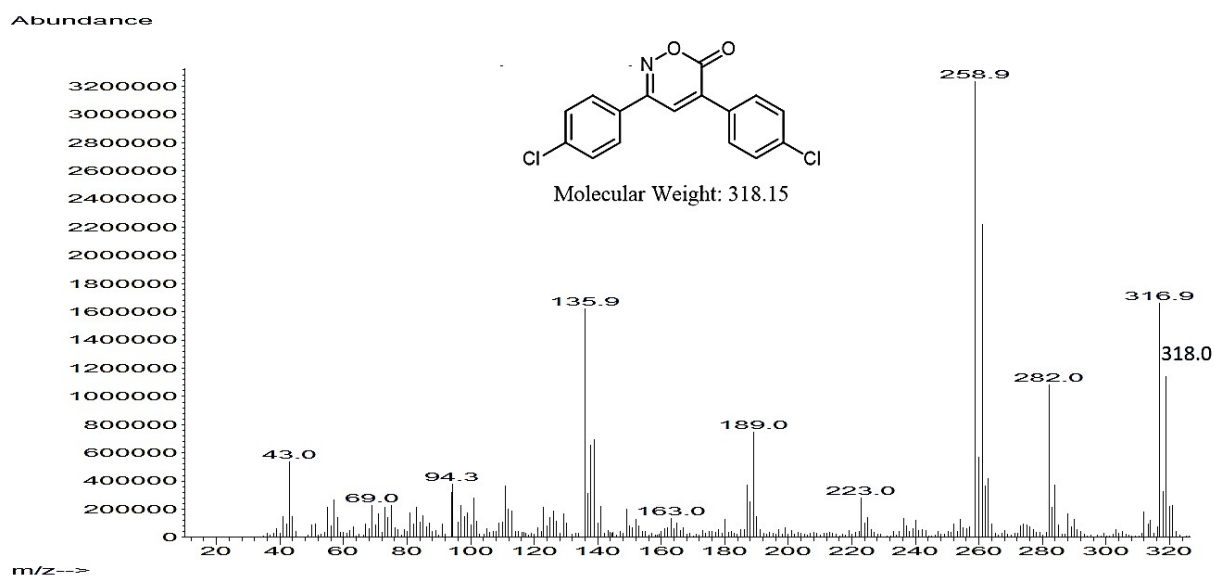

Figure S23. MS(IE) of 3.

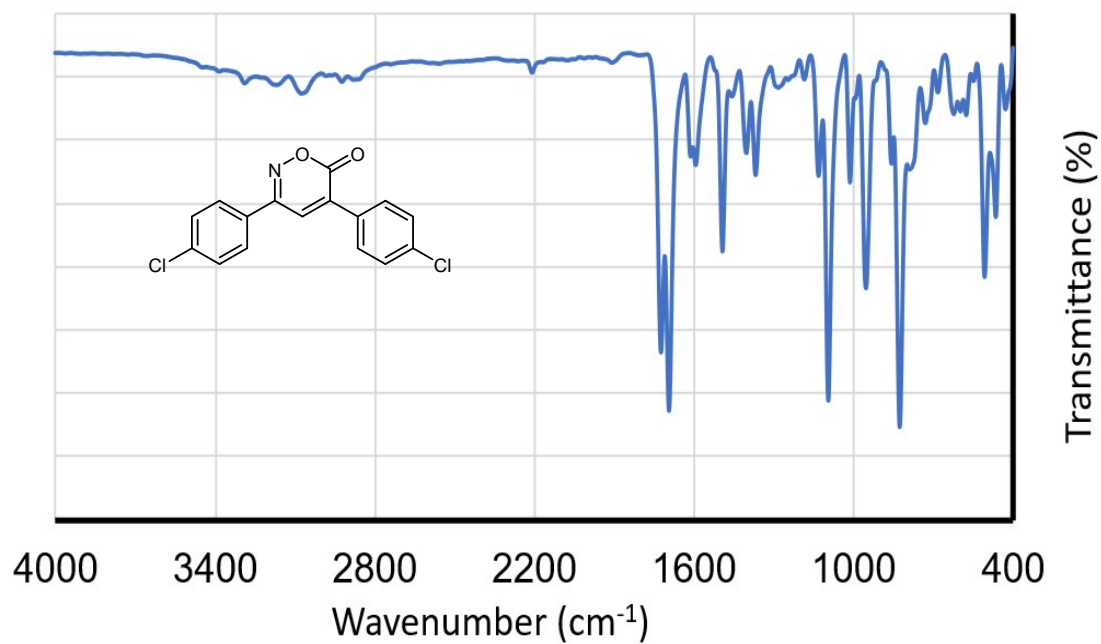

Figure S24. FT-IR of 3.

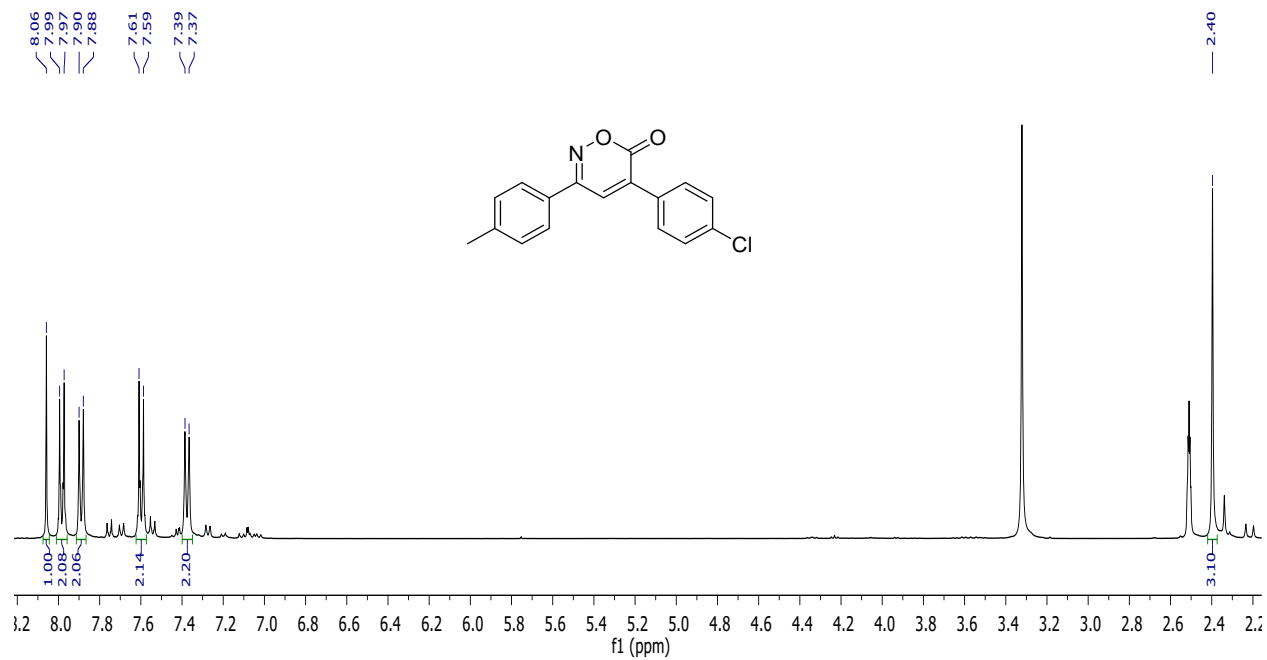

Figure S25. <sup>1</sup>H-NMR spectrum of 4 in DMSO-*d*<sub>6</sub>.

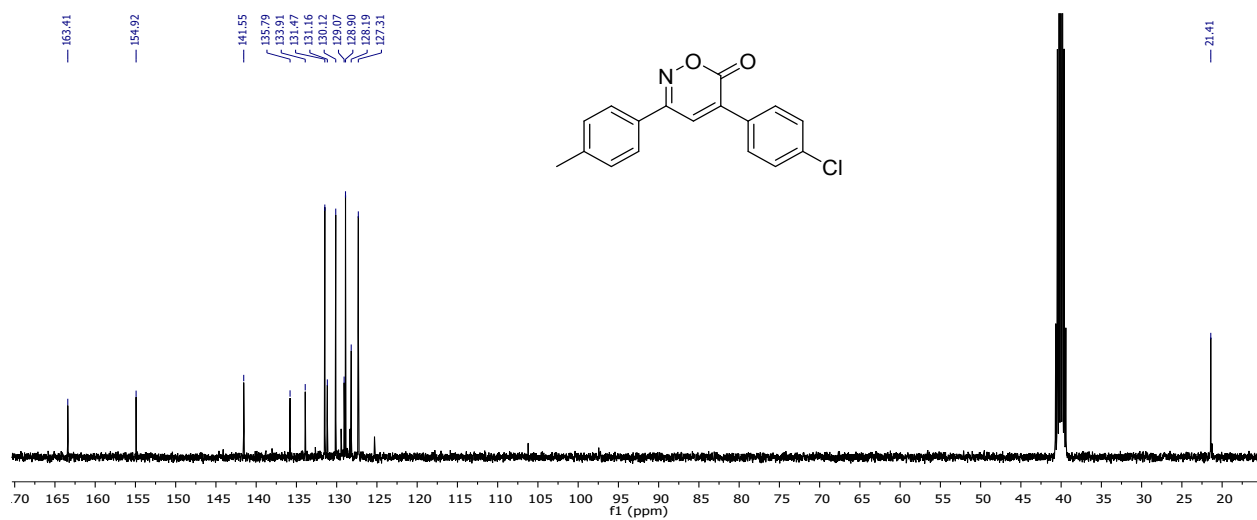

Figure S26. <sup>13</sup>C-NMR spectrum of 4 in DMSO-*d*<sub>6</sub>.

Abundance

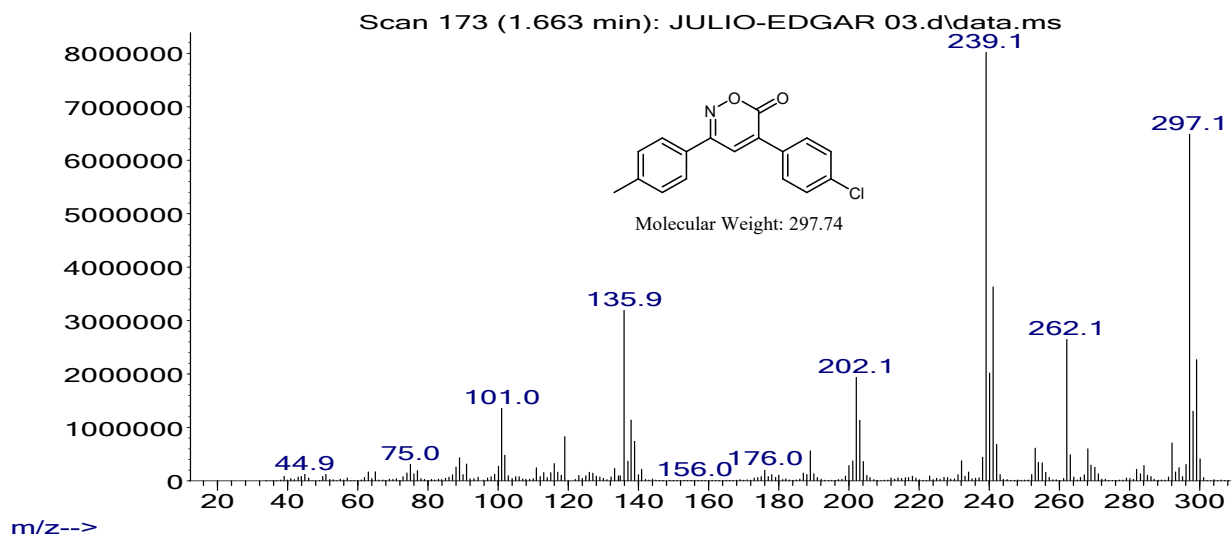

Figure S27. MS(IE) of 4.

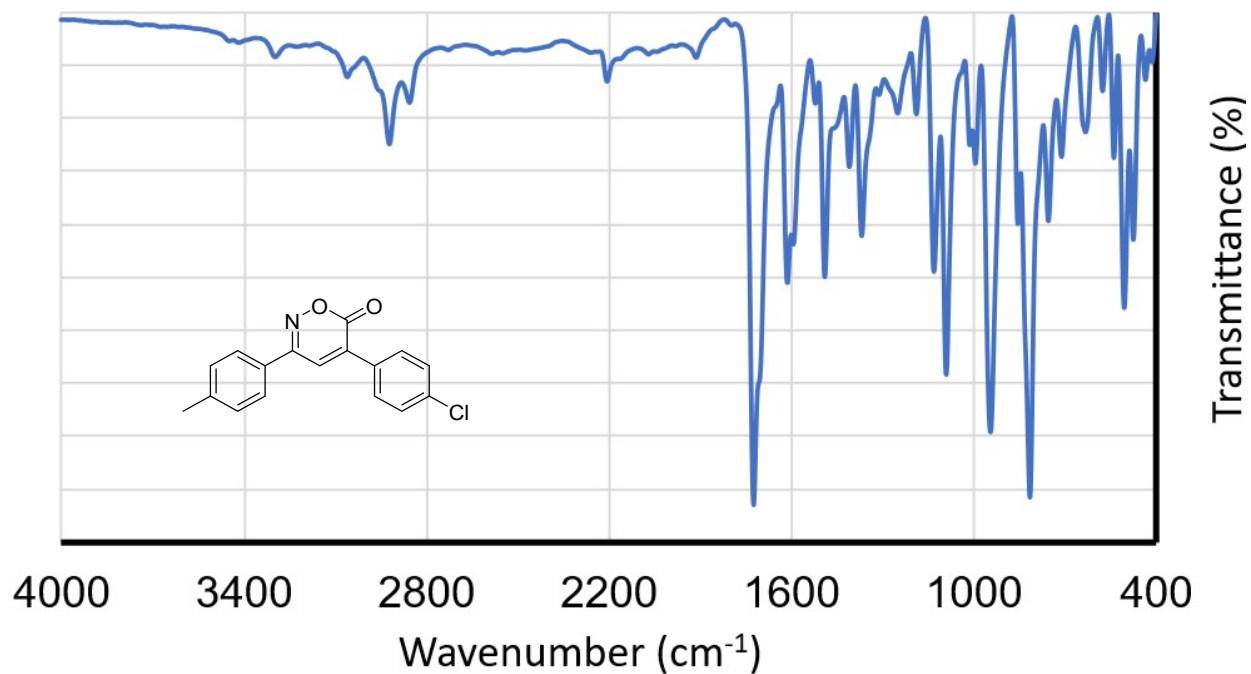

Figure S28. FT-IR of 4.

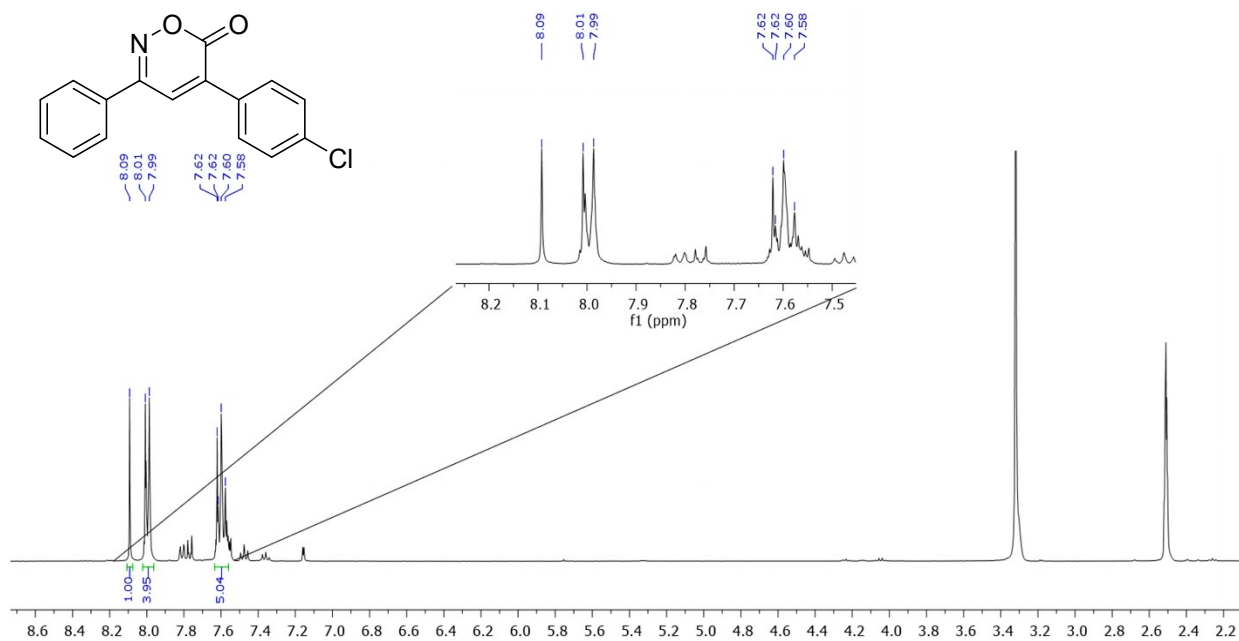

**Figure S29.**  $^1\text{H-NMR}$  spectrum of **5** in  $\text{DMSO-}d_6$ .

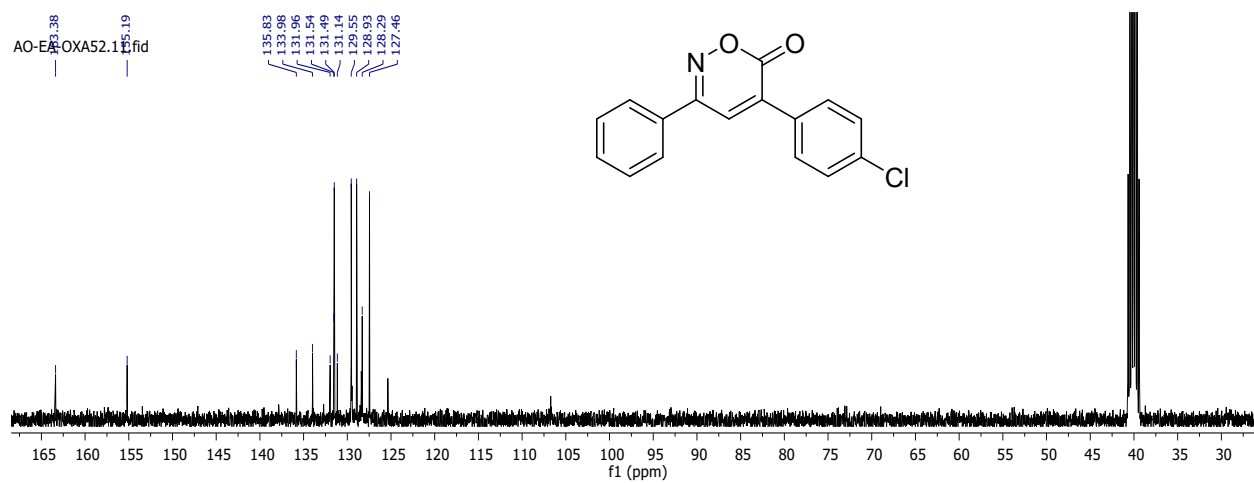

**Figure S30.**  $^{13}\text{C-NMR}$  spectrum of **5** in  $\text{DMSO-}d_6$ .

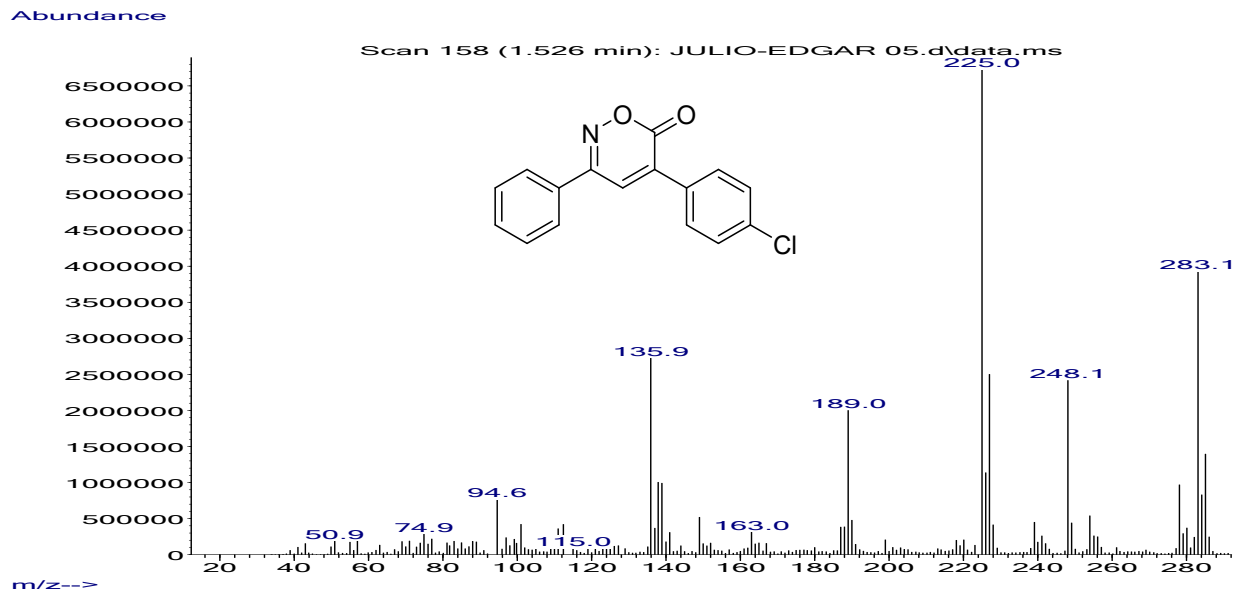

Figure S31. MS(IE) of 5.

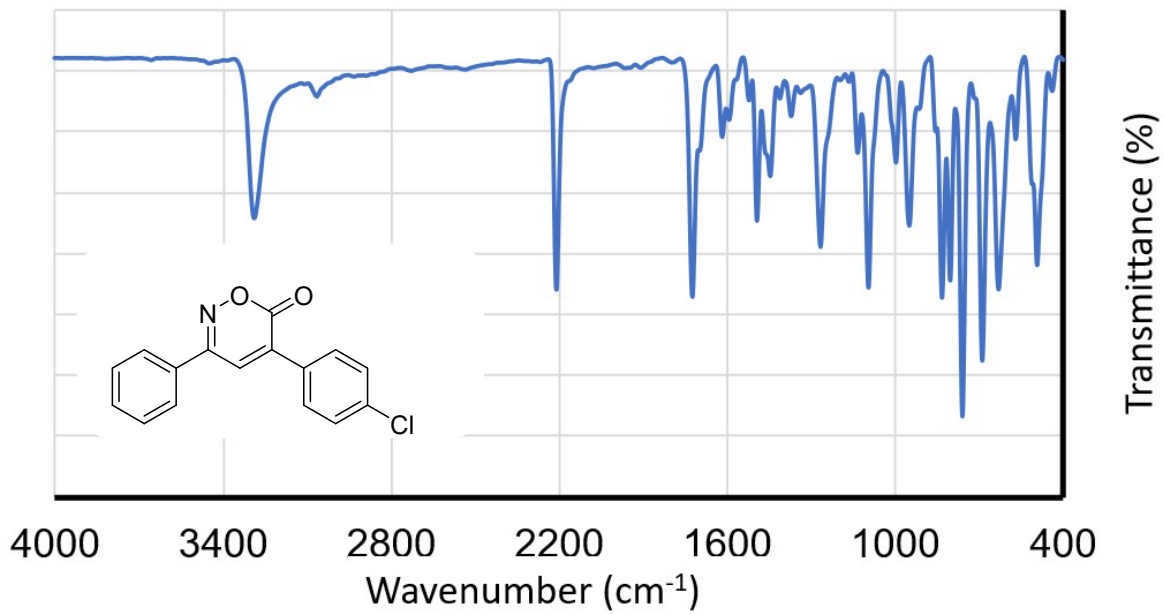

Figure S32. FT-IR of 5.

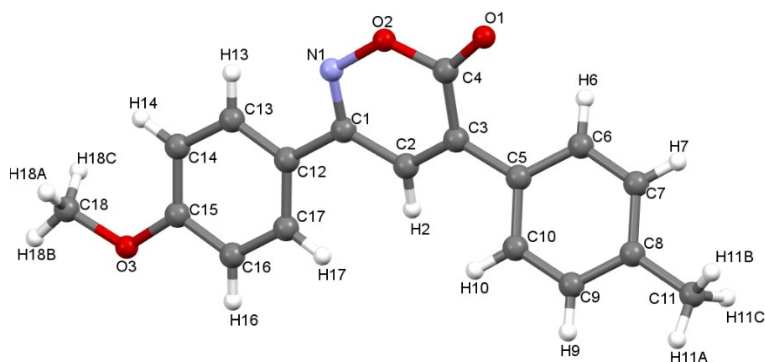

**Table S4. Crystal data and structure refinement for OXA-7**

|                                             |                                                   |
|---------------------------------------------|---------------------------------------------------|
| Identification code                         | OXA-7_                                            |
| Empirical formula                           | C <sub>18</sub> H <sub>15</sub> NO <sub>3</sub>   |
| Formula weight                              | 293.31                                            |
| Temperature/K                               | 293(2)                                            |
| Crystal system                              | monoclinic                                        |
| Space group                                 | P2 <sub>1</sub> /n                                |
| a/Å                                         | 5.0224(7)                                         |
| b/Å                                         | 13.540(2)                                         |
| c/Å                                         | 21.561(3)                                         |
| α/°                                         | 90                                                |
| β/°                                         | 90                                                |
| γ/°                                         | 90                                                |
| Volume/Å <sup>3</sup>                       | 1466.2(4)                                         |
| Z                                           | 4                                                 |
| ρ <sub>calc</sub> /mg/mm <sup>3</sup>       | 1.329                                             |
| μ/mm <sup>-1</sup>                          | 0.091                                             |
| F(000)                                      | 616.0                                             |
| Crystal size/mm <sup>3</sup>                | 0.324 × 0.154 × 0.112                             |
| 2θ range for data collection                | 7.108 to 58.978°                                  |
| Index ranges                                | -6 ≤ h ≤ 5, -13 ≤ k ≤ 18, -26 ≤ l ≤ 29            |
| Reflections collected                       | 9792                                              |
| Independent reflections                     | 3460[R(int) = 0.0403]                             |
| Data/restraints/parameters                  | 3460/0/201                                        |
| Goodness-of-fit on F <sup>2</sup>           | 1.051                                             |
| Final R indexes [I ≥ 2σ (I)]                | R <sub>1</sub> = 0.0566, wR <sub>2</sub> = 0.1209 |
| Final R indexes [all data]                  | R <sub>1</sub> = 0.1102, wR <sub>2</sub> = 0.1467 |
| Largest diff. peak/hole / e Å <sup>-3</sup> | 0.16/-0.23                                        |



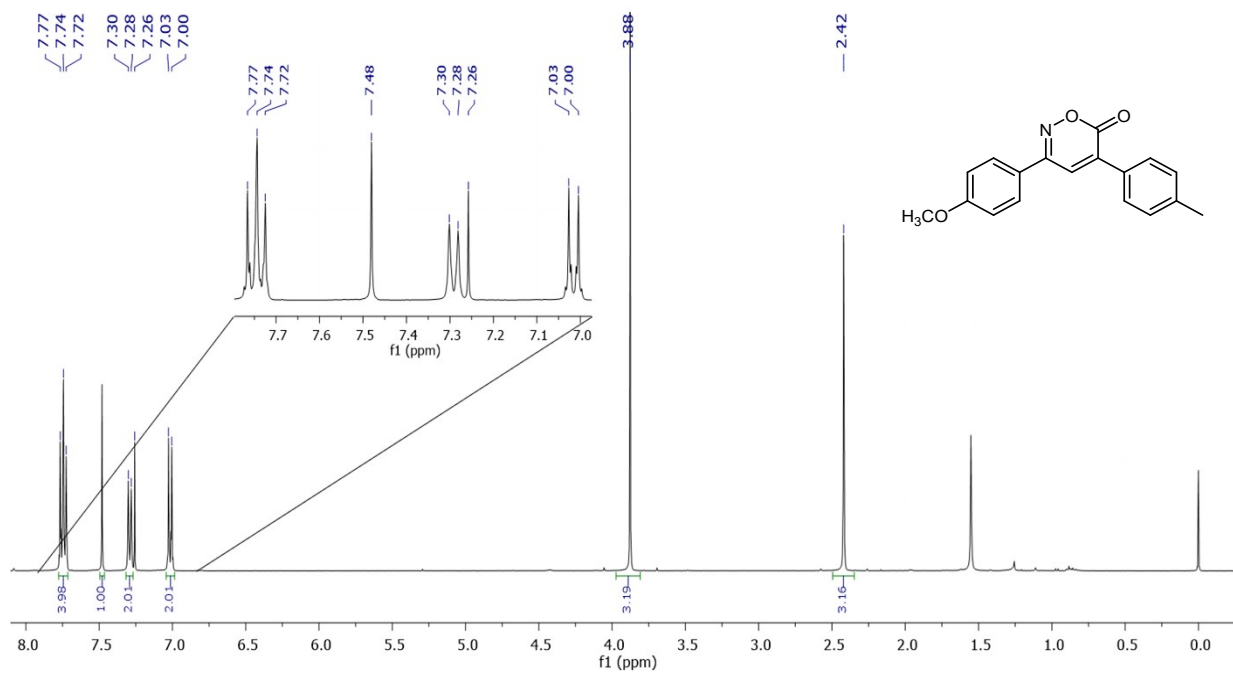

Figure S33.  $^1\text{H-NMR}$  spectrum of **7** in  $\text{CDCl}_3$ .

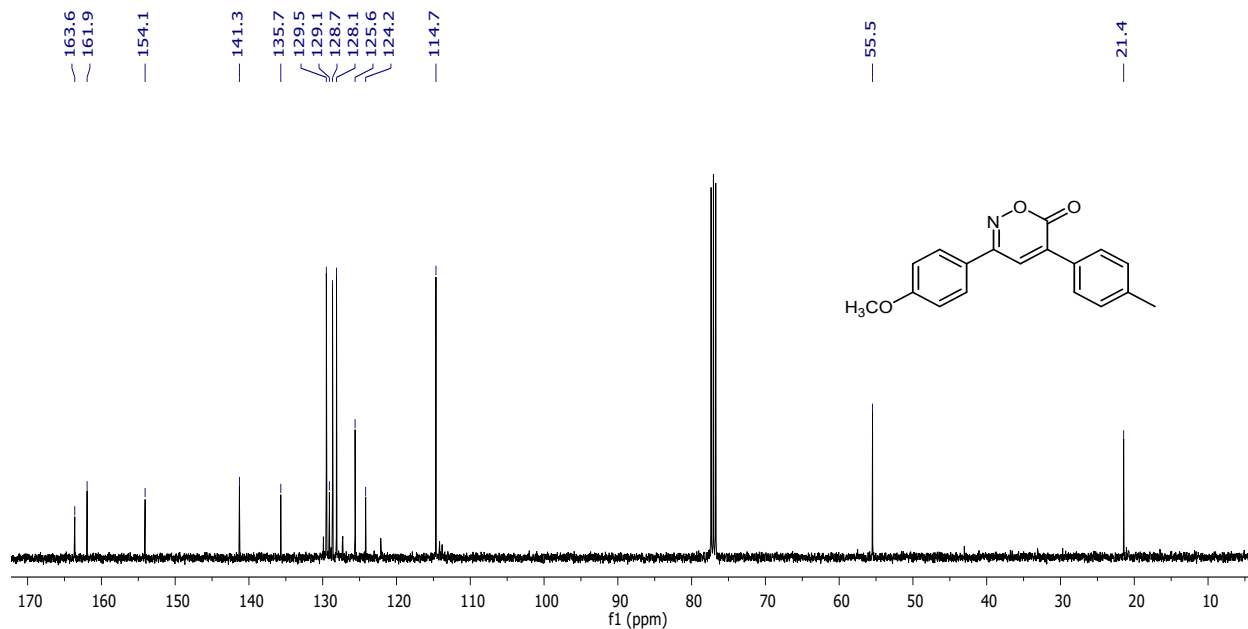

Figure S34.  $^{13}\text{C-NMR}$  spectrum of **7** in  $\text{CDCl}_3$ .

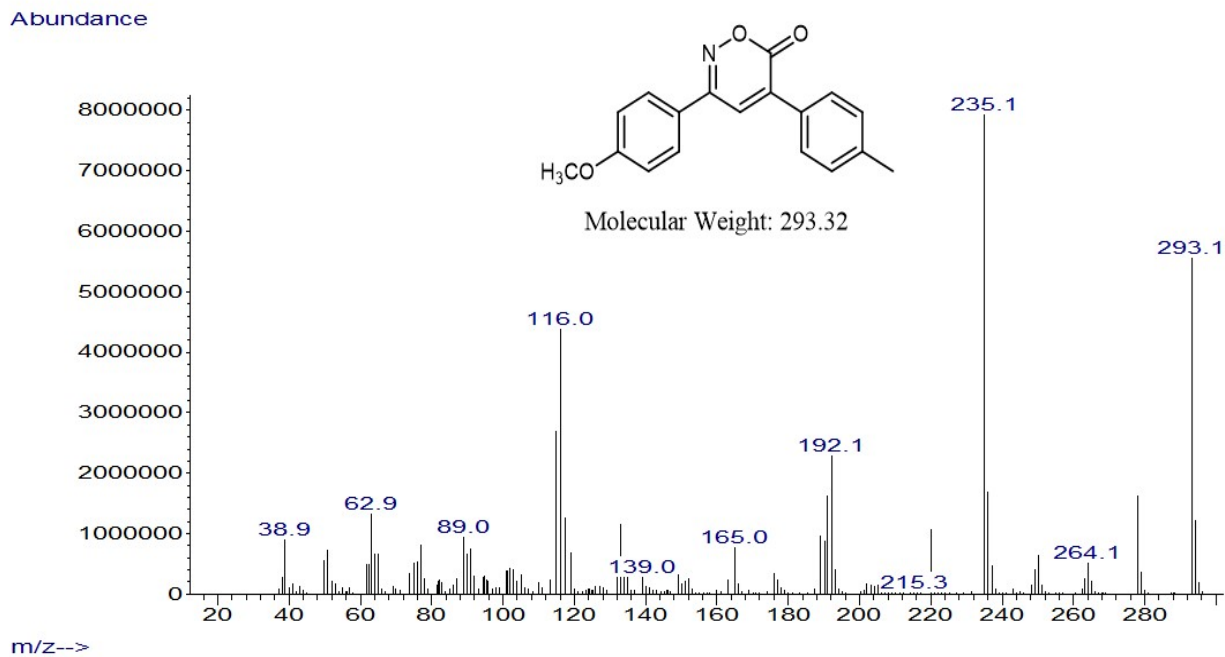

Figure S35. MS(IE) of 7.

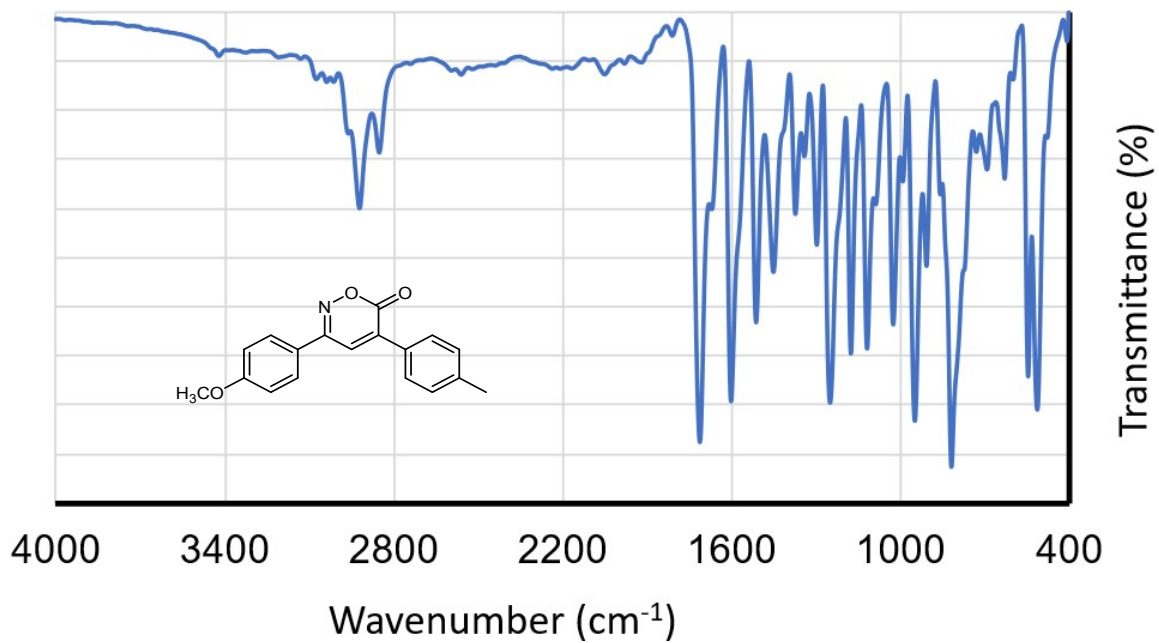

Figure S36. FT-IR of 7.

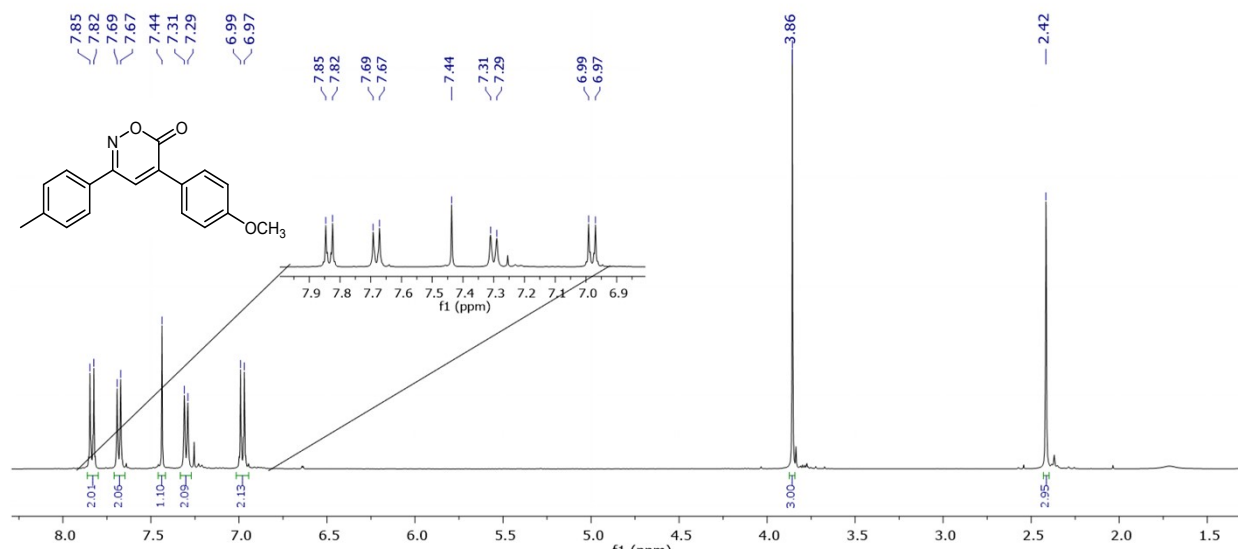

Figure S37. <sup>1</sup>H-NMR spectrum of **8** in CDCl<sub>3</sub>.

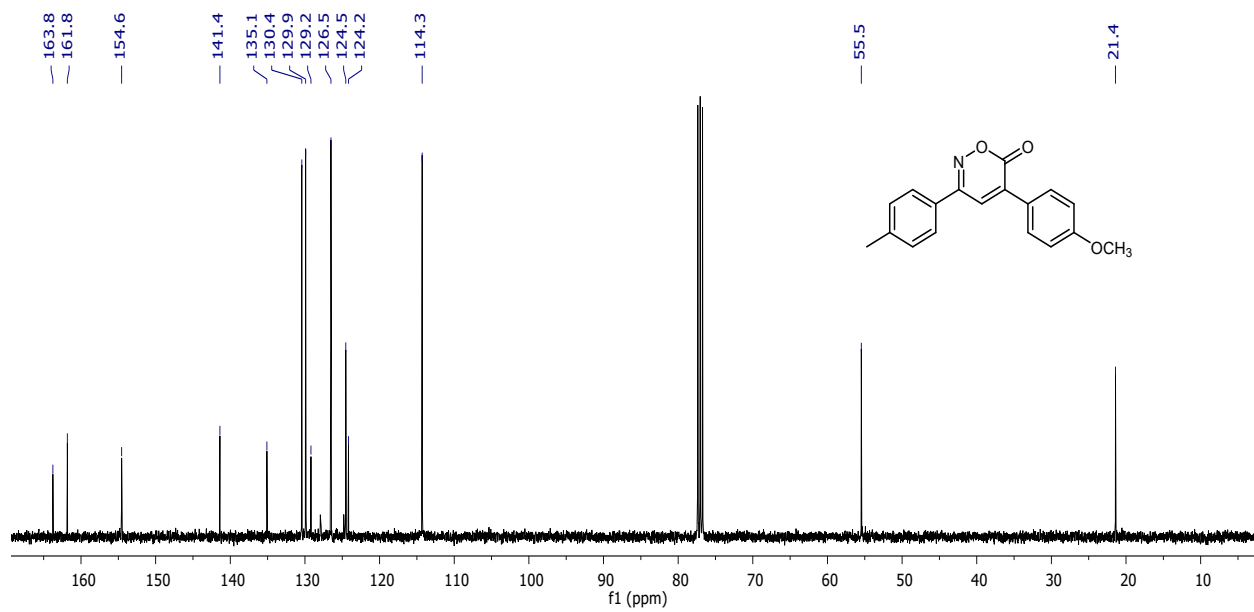

Figure S38. <sup>13</sup>C-NMR spectrum of **8** in CDCl<sub>3</sub>.

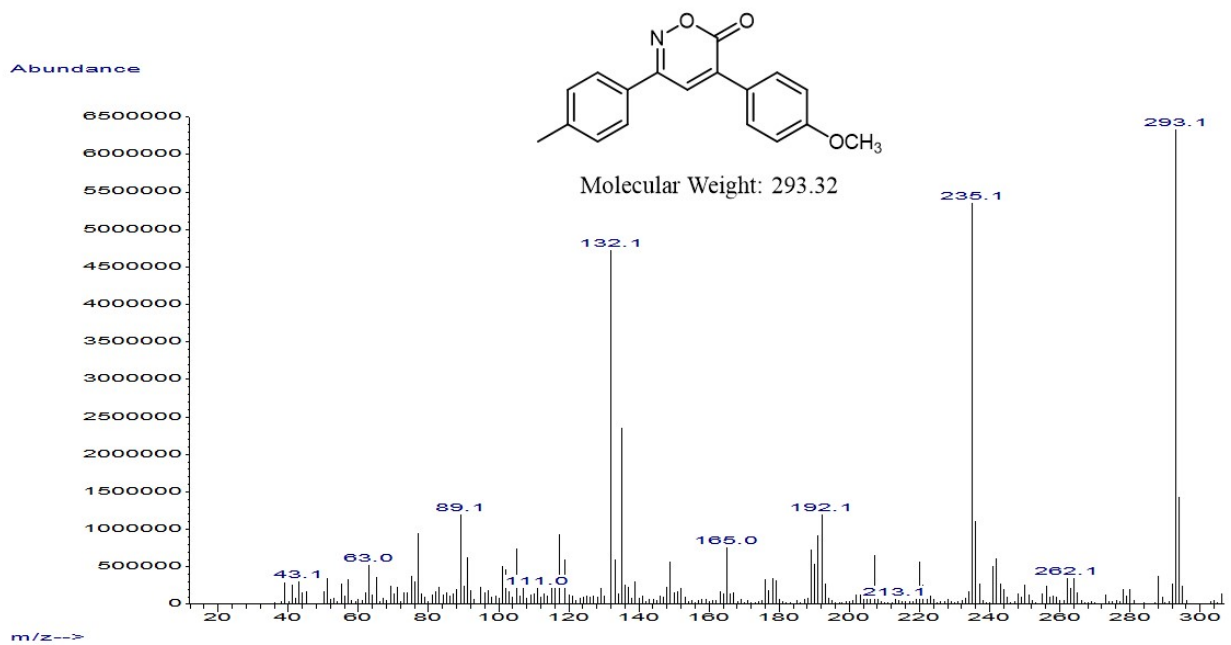

Figure S39. MS(IE) of 8.

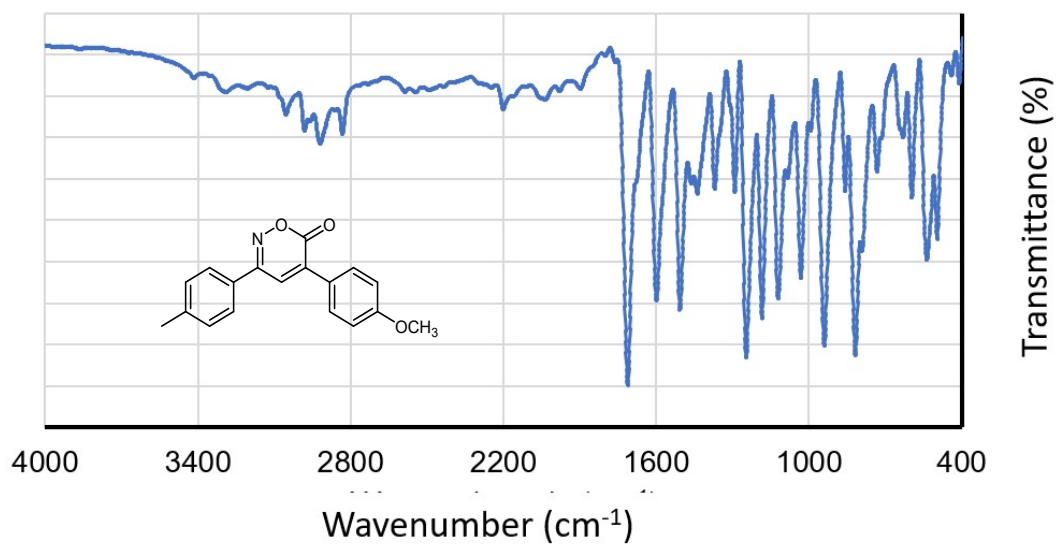

Figure S40. FT-IR of 8.

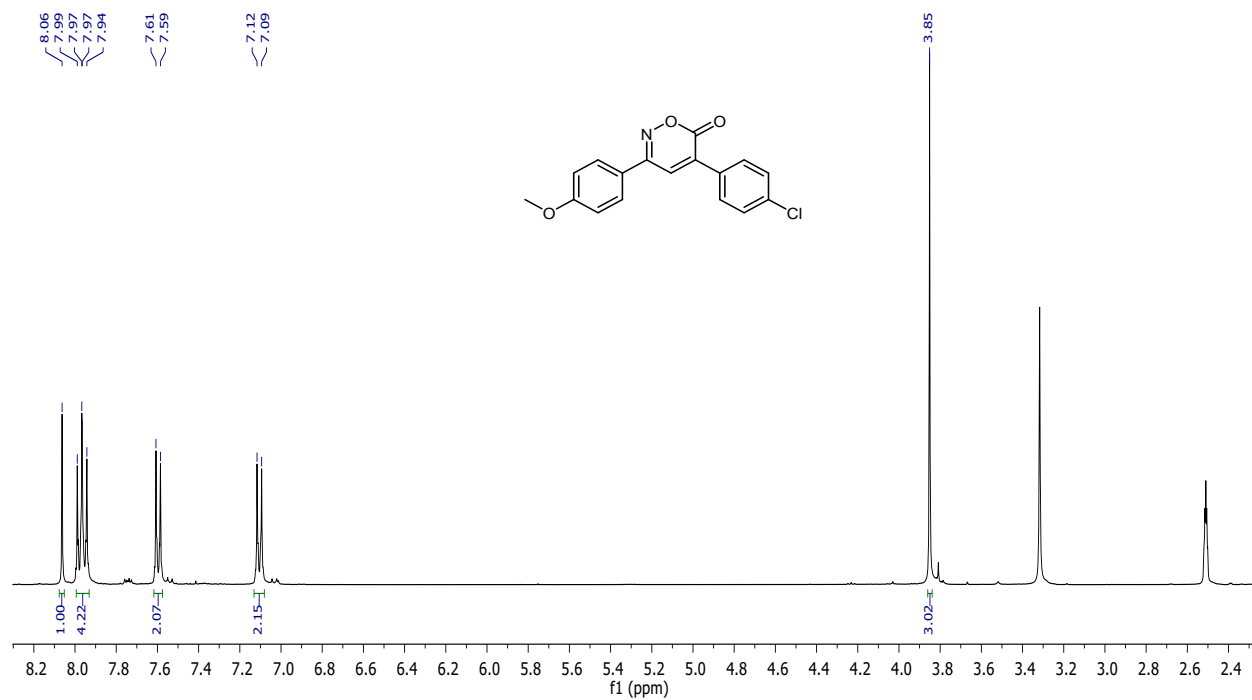

Figure S41. <sup>1</sup>H-NMR spectrum of **9** in DMSO-*d*<sub>6</sub>.

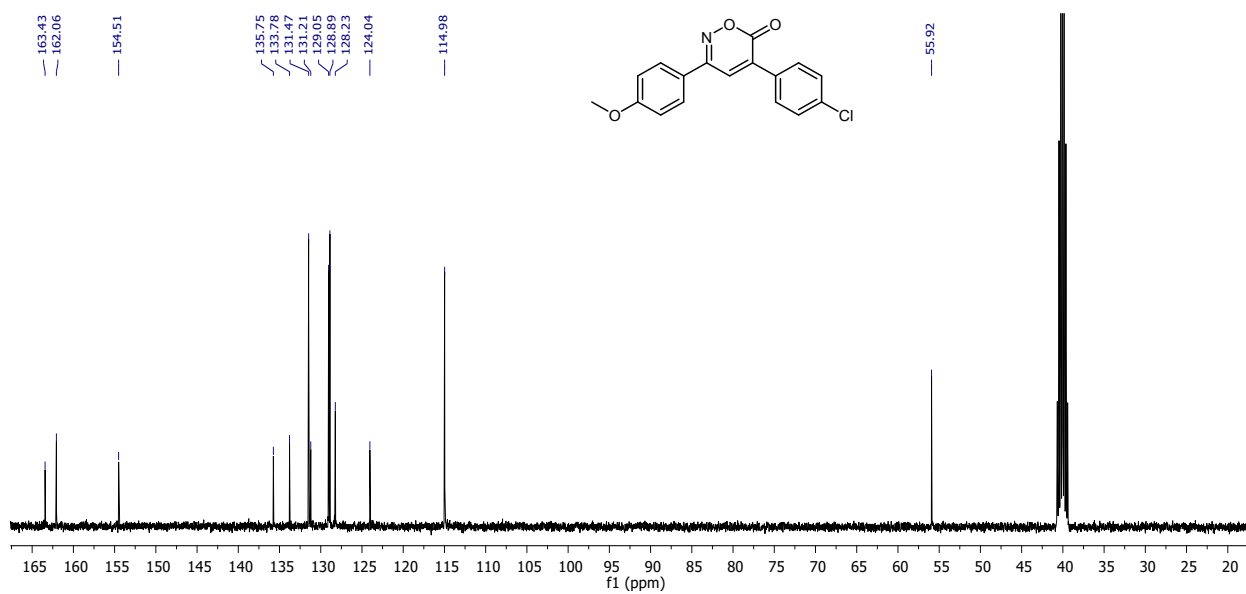

Figure S42. <sup>13</sup>C-NMR spectrum of **9** in DMSO-*d*<sub>6</sub>.

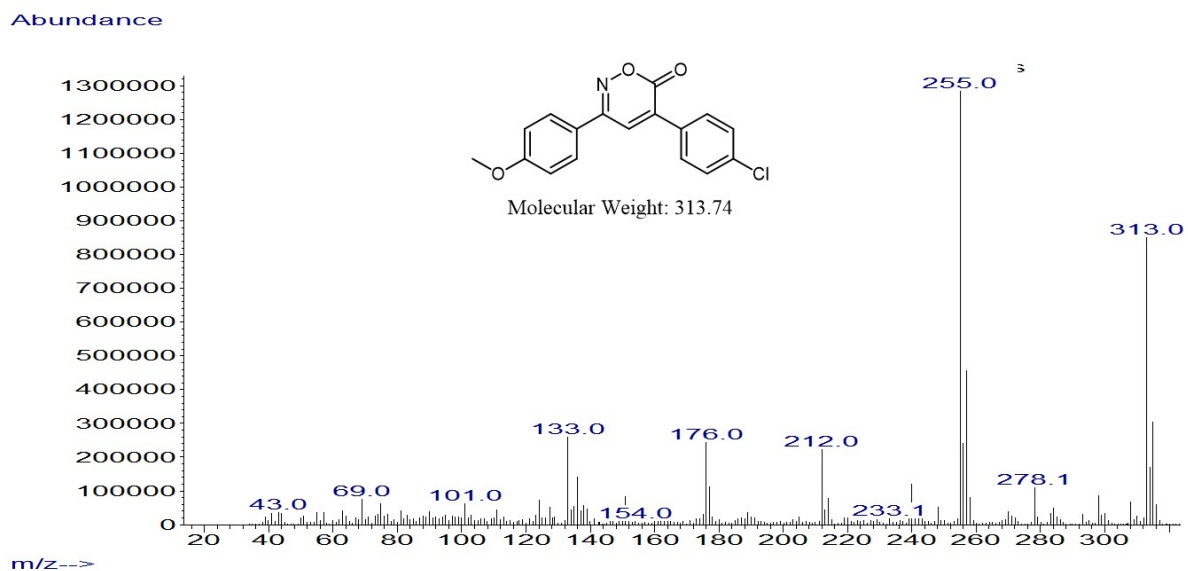

Figure S43. MS(IE) of 9.

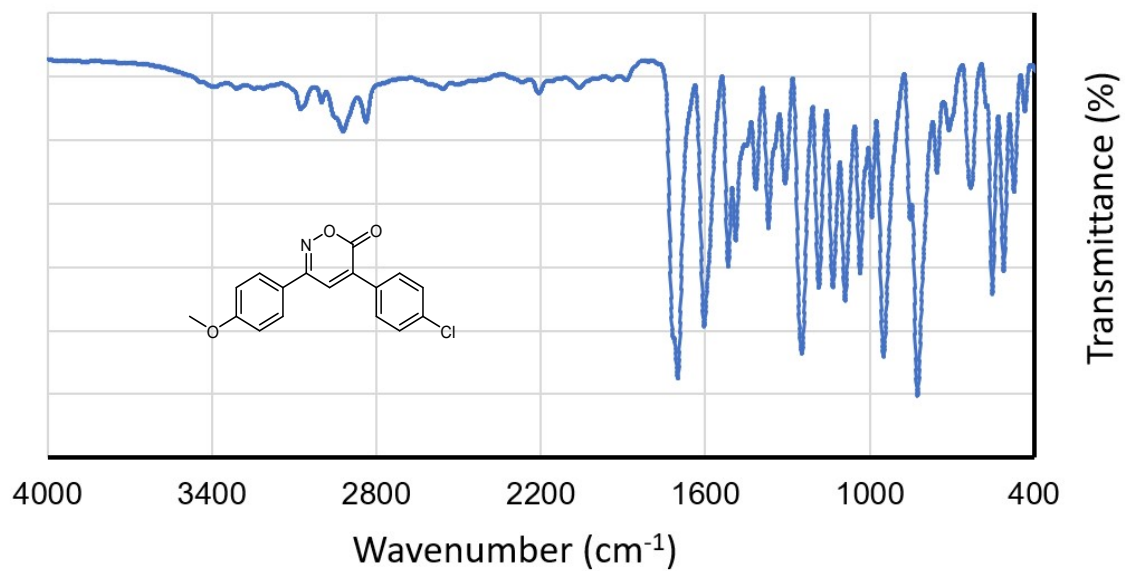

Figure S44. FT-IR of 9.

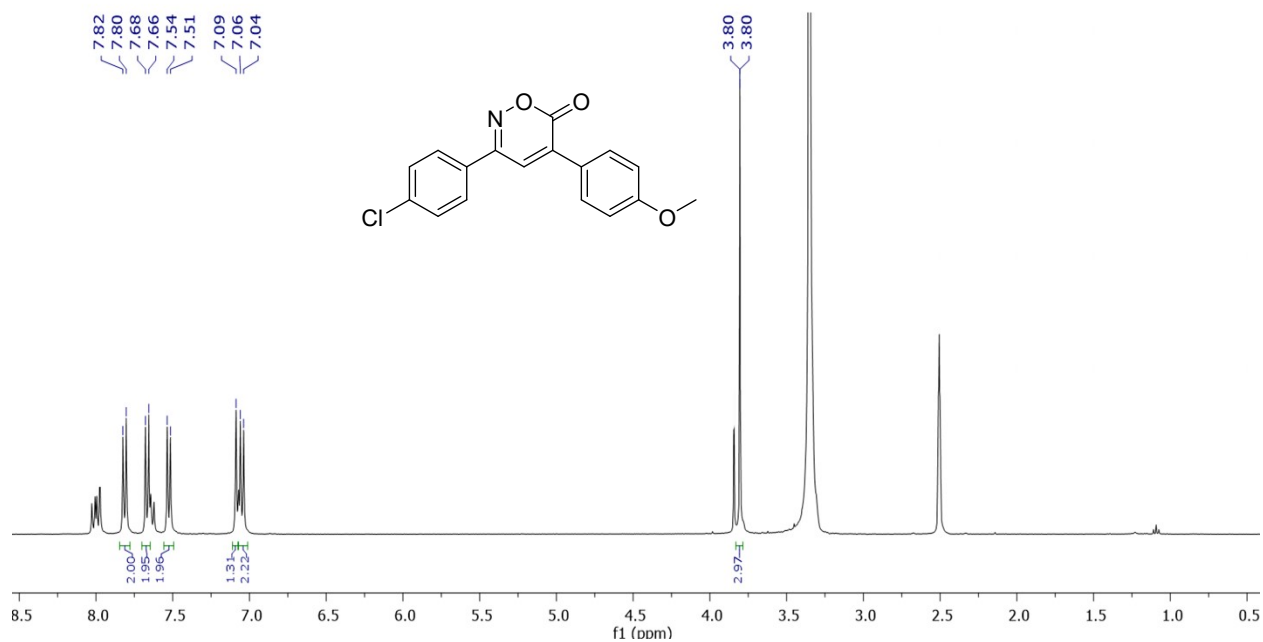

**Figure S45.** <sup>1</sup>H-NMR spectrum of **10** in DMSO-*d*<sub>6</sub>.

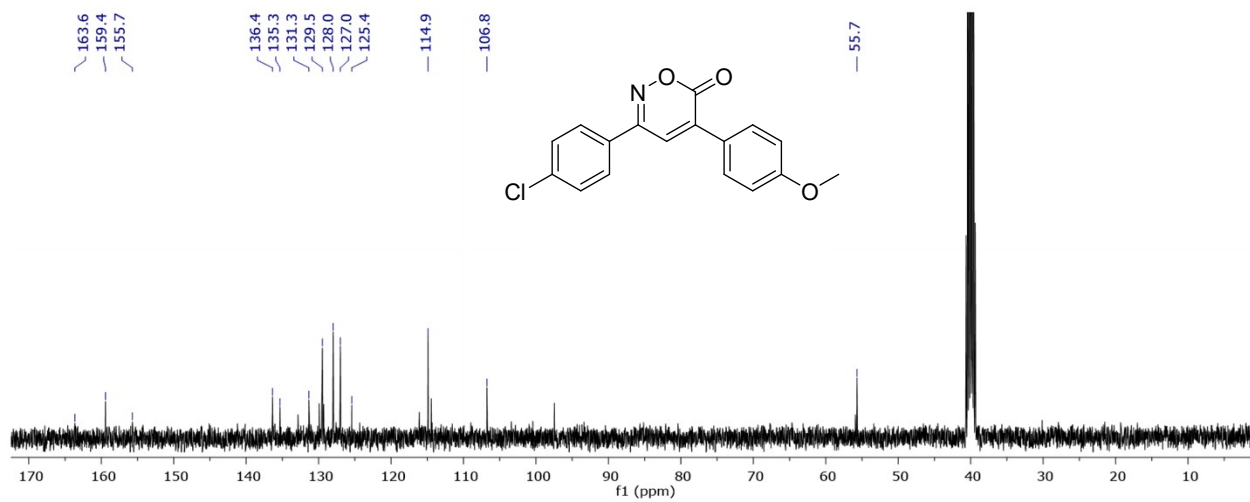

**Figure S46.** <sup>13</sup>C-NMR spectrum of **10** in DMSO-*d*<sub>6</sub>.

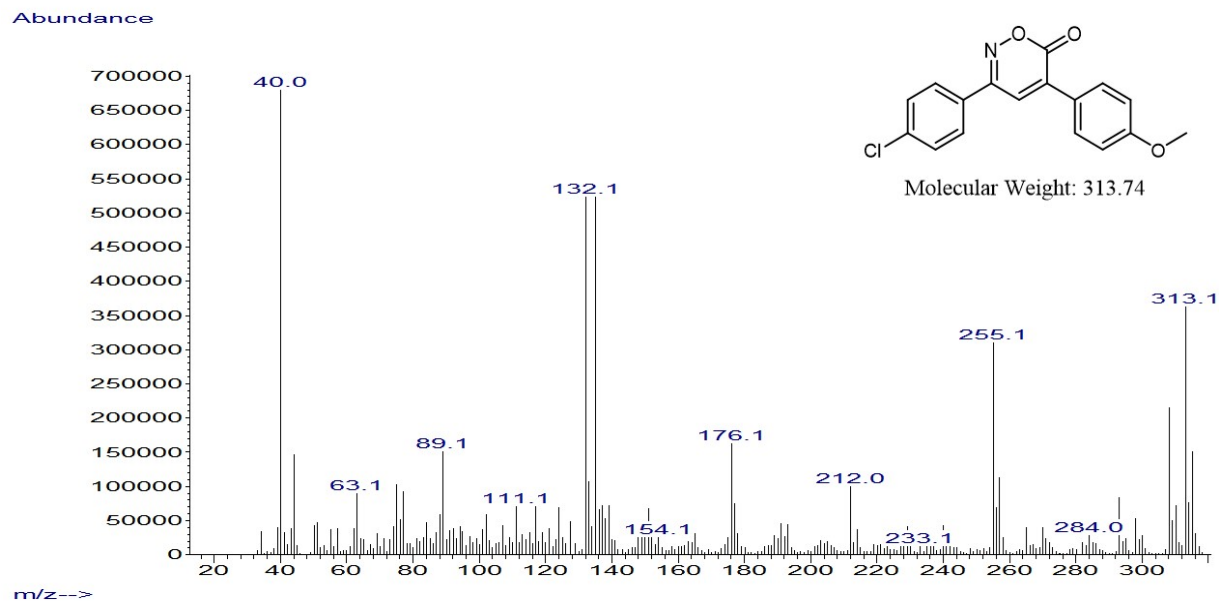

Figure S47. MS(IE) of 10.

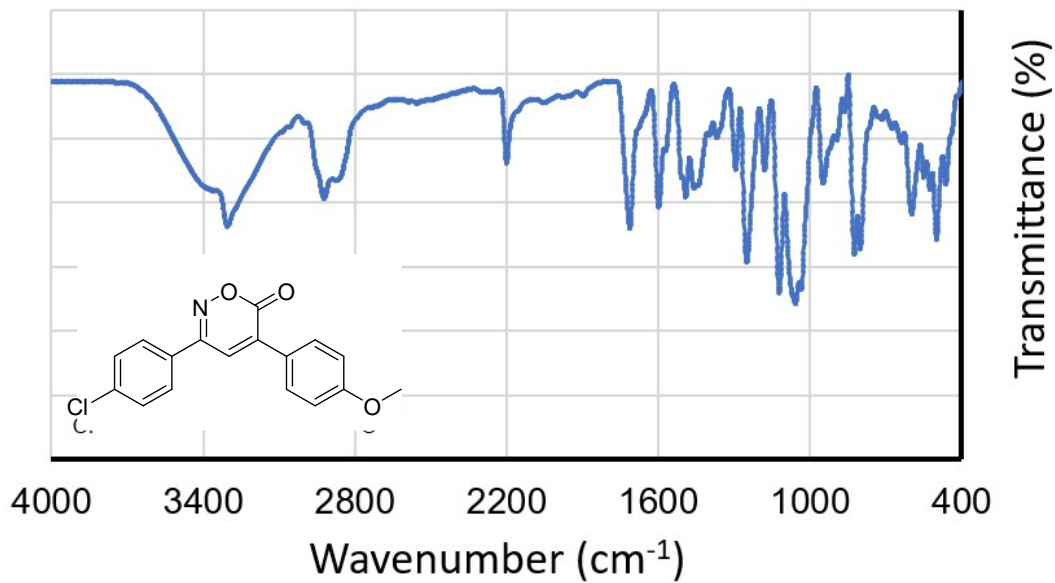

Figure S48. FT-IR of 10.



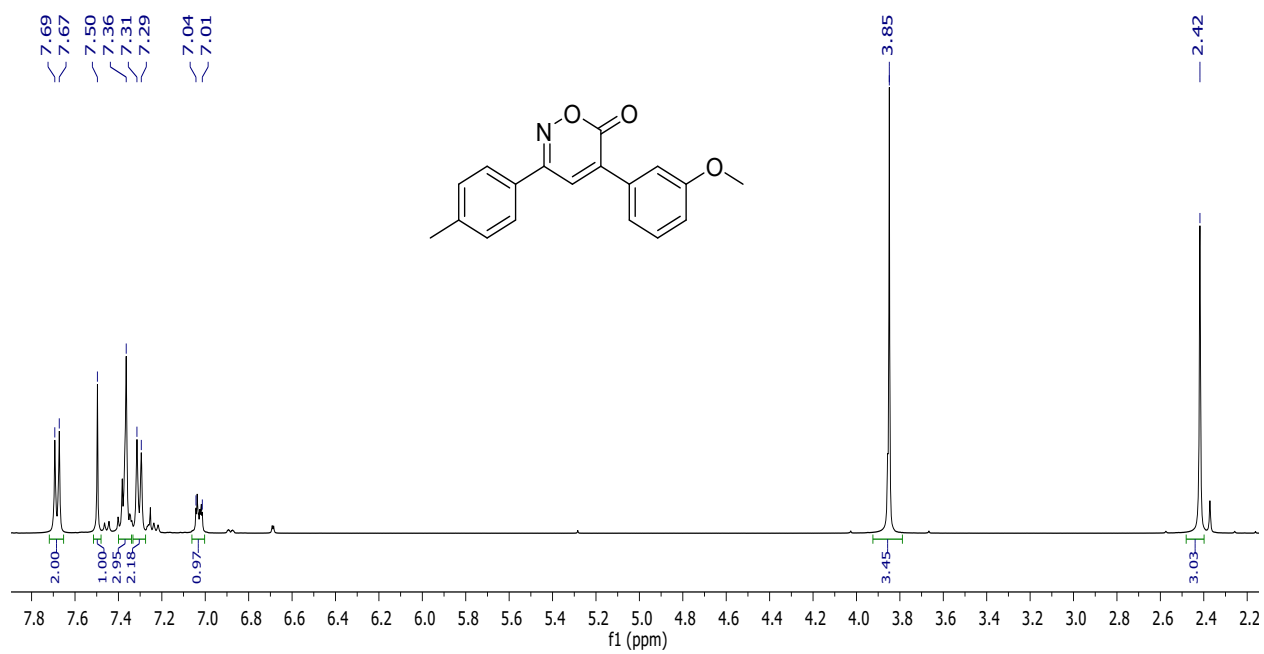

Figure S49. <sup>1</sup>H-NMR spectrum of 11 in CDCl<sub>3</sub>.

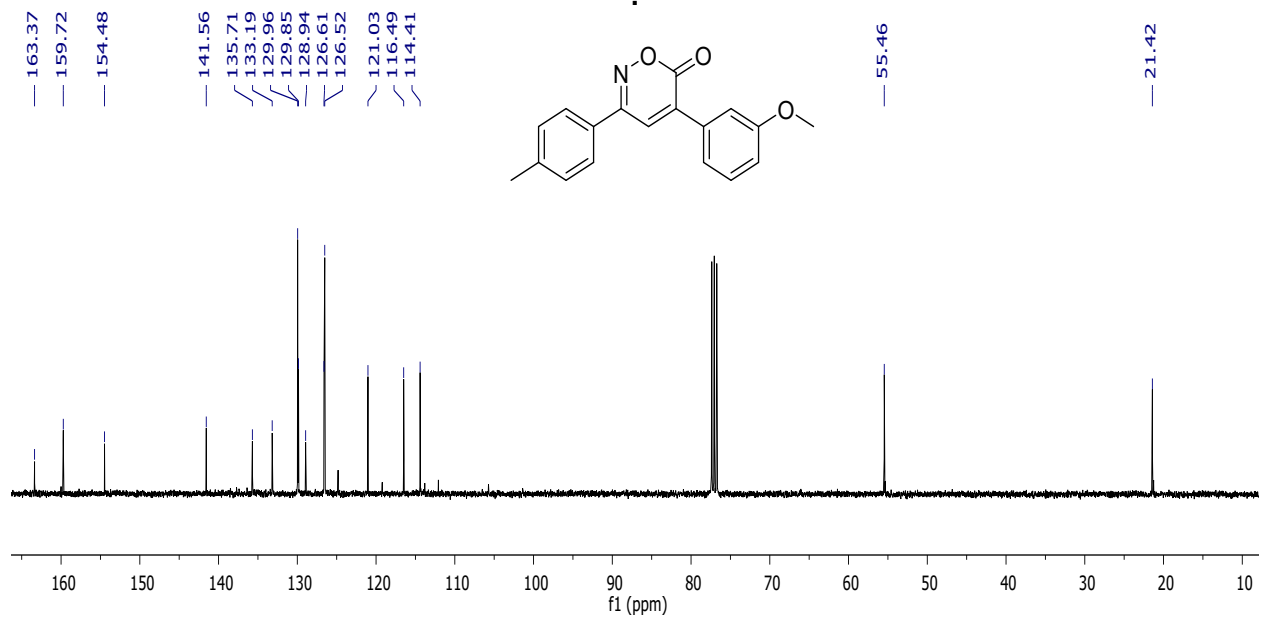

Figure S50. <sup>13</sup>C-NMR spectrum of 11 in CDCl<sub>3</sub>.

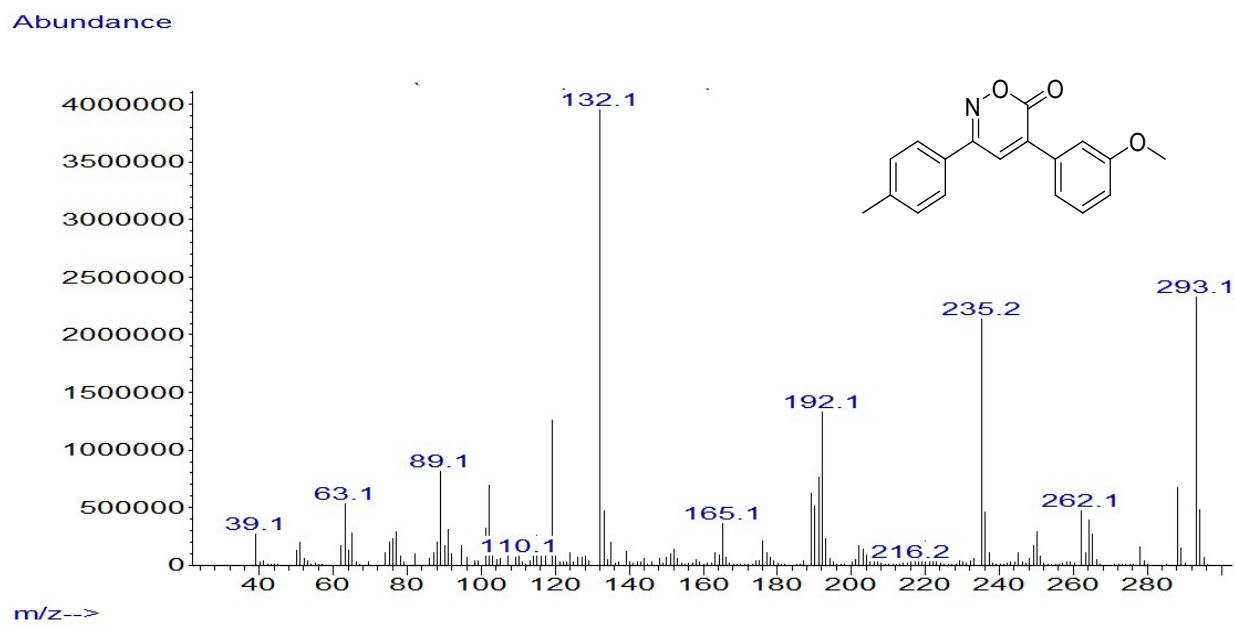

Figure S51. MS(IE) of 11.

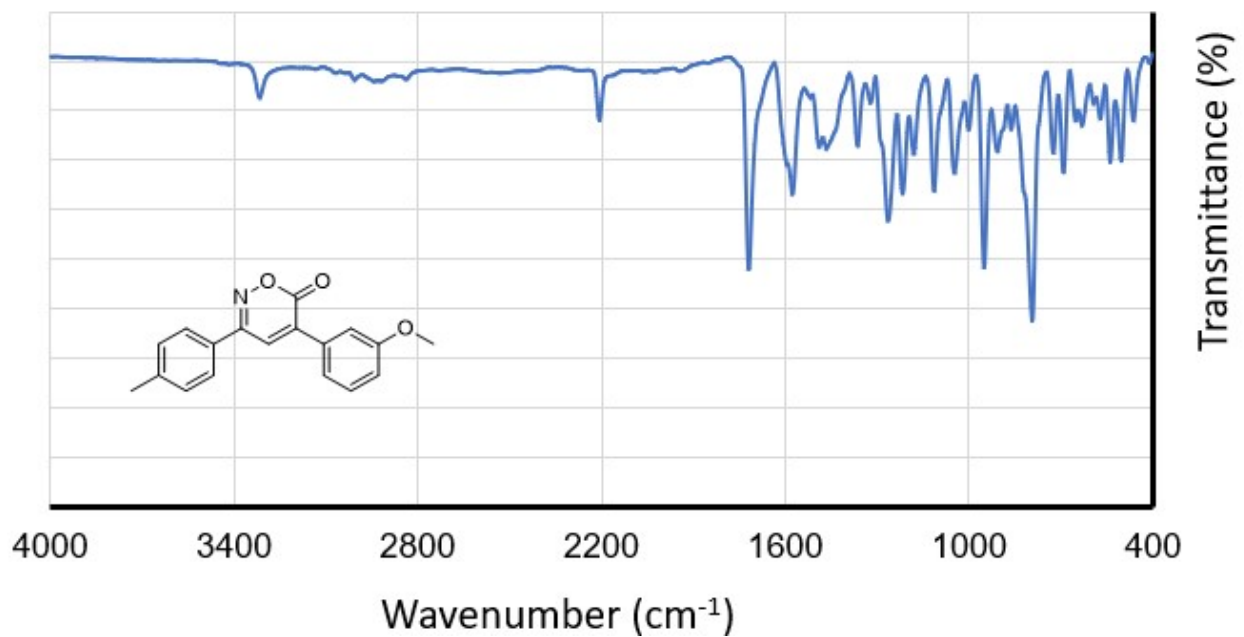

Figure S52. FT-IR of 11.

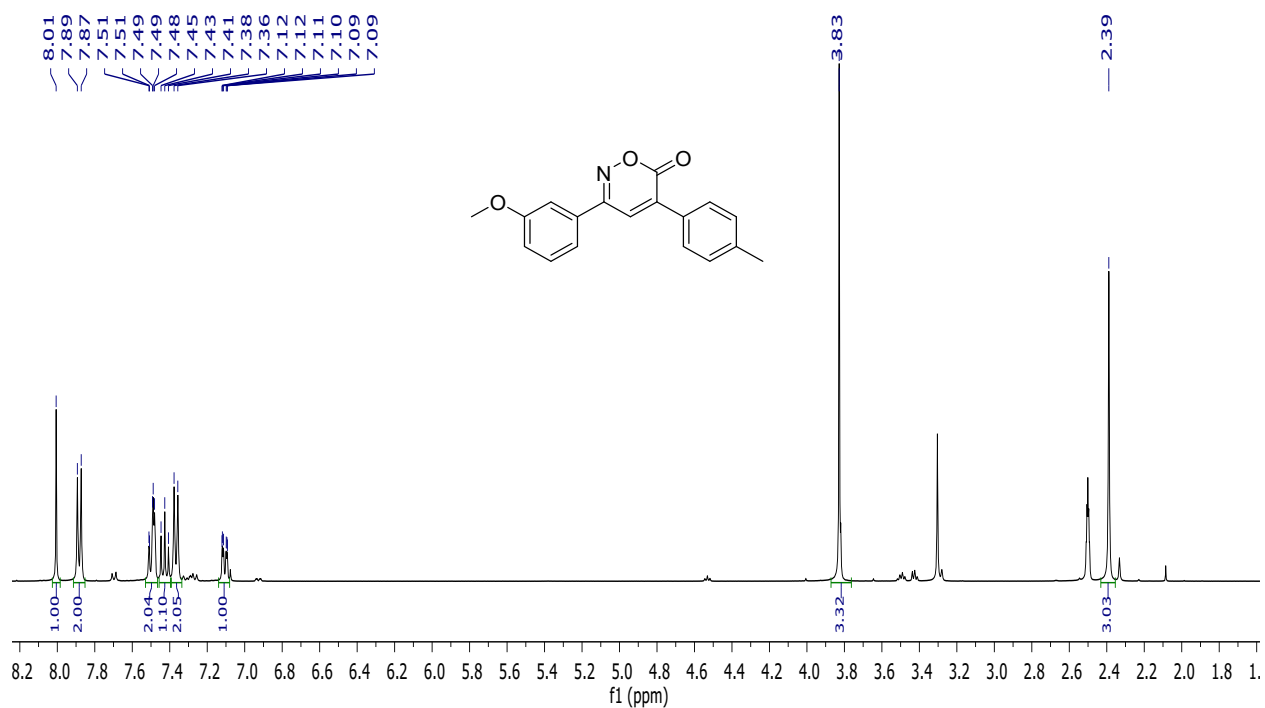

**Figure S53.** <sup>1</sup>H-NMR spectrum of **12** in DMSO-*d*<sub>6</sub>.

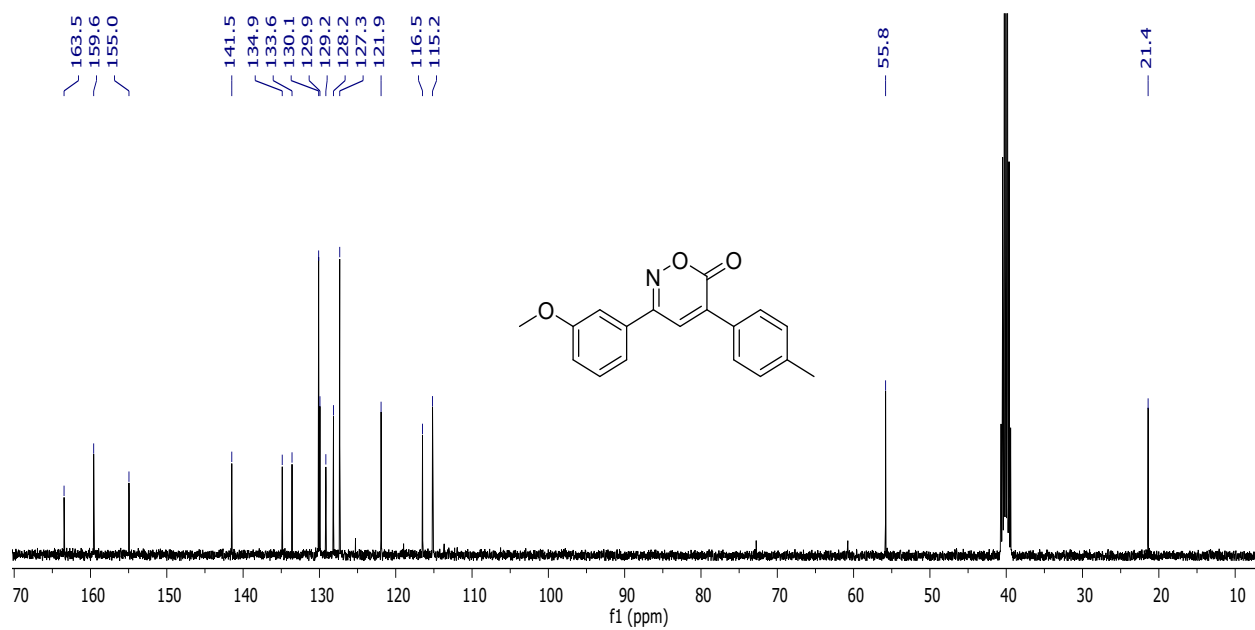

**Figure S54.** <sup>13</sup>C-NMR spectrum of **12** in DMSO-*d*<sub>6</sub>.

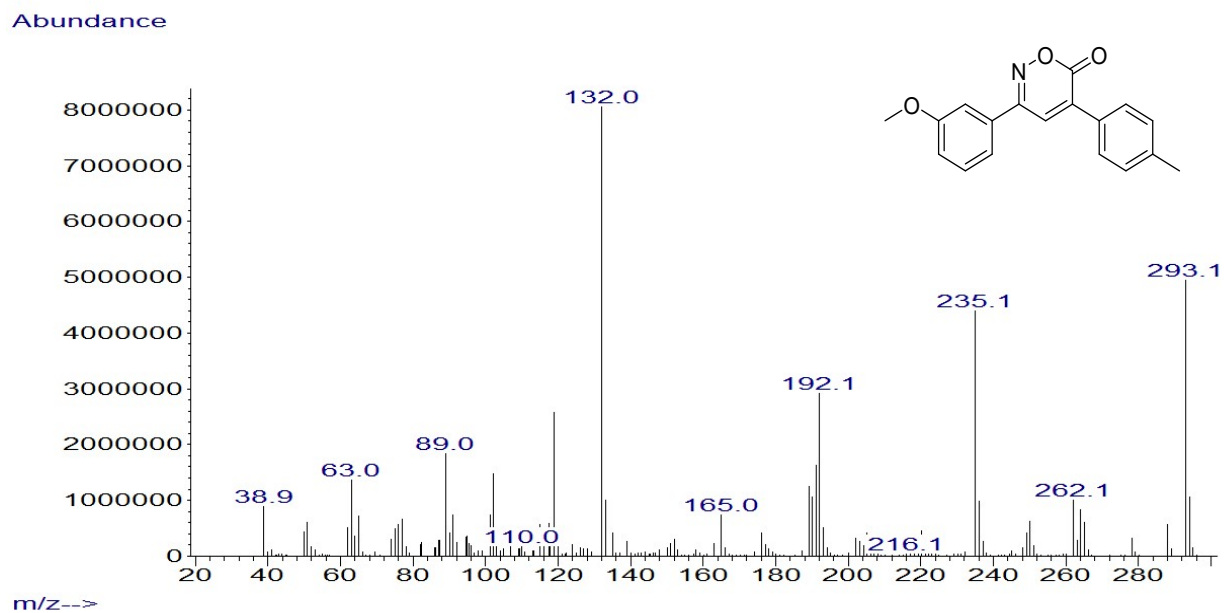

Figure S55. MS(IE) of 12.

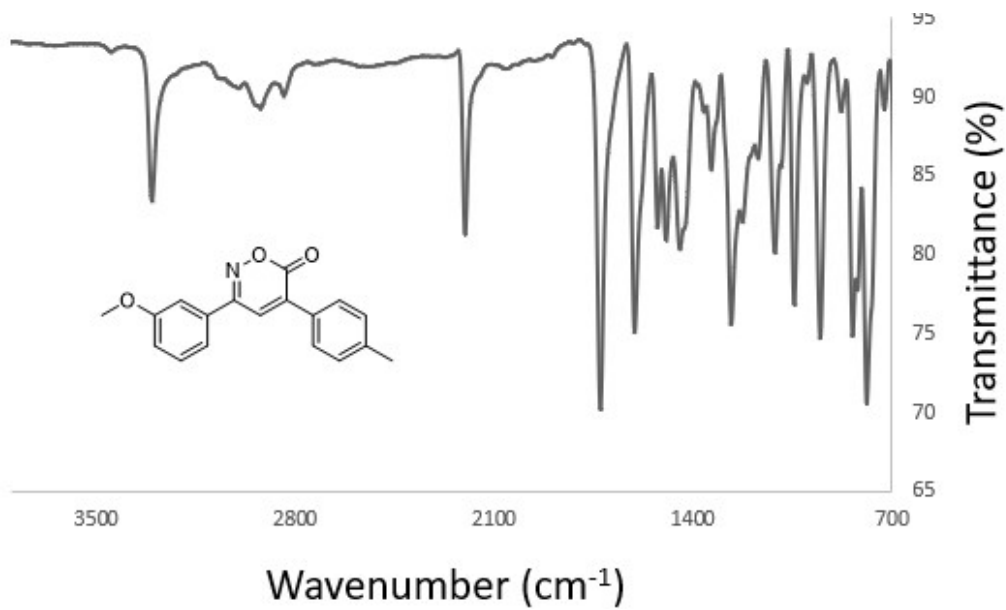

Figure S56. FT-IR of 12.

**Table S5.** Bacterial strains used in the antimicrobial test of 6H-1,2-oxazin-6-ones.

| ATCC strains <sup>a</sup> | Clinically isolated strains <sup>b</sup> |
|---------------------------|------------------------------------------|
| 43300 MRSA                | MRSA-03                                  |
| 25922                     | MRSA-04                                  |
|                           | MRSA-05                                  |

MRSA: Meticillin Resistant *Staphylococcus aureus*. 25922: *Escherichia coli*

a: ATCC strains were obtained from DIFCO Laboratories, Michigan, U.S.A.

b: Clinically isolated strains were donated by Laboratorio de Bacteriología del Instituto Nacional de Pediatría de México, Ciudad de México, México.

**Table S6.** MIC ( $\mu\text{g/mL}$ ) of Linezolid and Gentamicin against bacterial strains used in the study.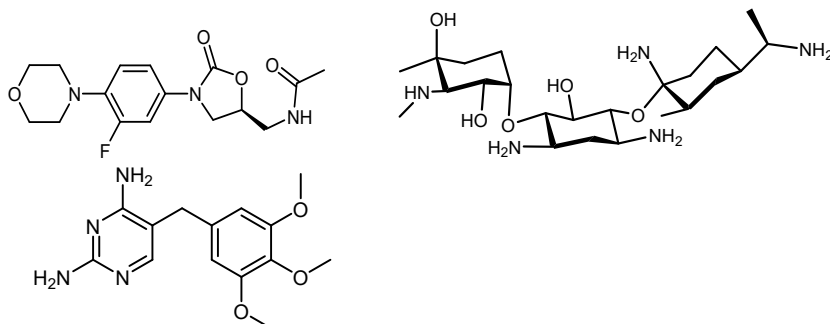

| Bacterial  | Linezolid | Gentamicin | Trimethoprim |
|------------|-----------|------------|--------------|
| 43300 MRSA | 4         | 2          | 1            |
| 25922      | >50       | 1          | >50          |
| MRSA-03    | 4         | 2          | 1            |
| MRSA-04    | 8         | 2          | 2            |
| MRSA-05    | 8         | 1          | 2            |

**Table S7.** Determination *in vitro* toxicity of 6H-1,2-oxazin-6-ones by the *Artemia salina* model.

| <b>Compounds</b> | <b>DLT</b> | <b>ALT</b> | <b>% Mortality</b> | <b>% Vitality</b> |
|------------------|------------|------------|--------------------|-------------------|
| <b>1</b>         | 0          | 10         | 0                  | 100               |
| <b>2</b>         | 0          | 10         | 0                  | 100               |
| <b>3</b>         | 0          | 10         | 0                  | 100               |
| <b>4</b>         | 0          | 10         | 0                  | 100               |
| <b>6</b>         | 0          | 10         | 0                  | 100               |
| <b>8</b>         | 0          | 10         | 0                  | 100               |

% Mortality =  $DLT / ALT \times 100 \%$ , DLT is the number of dead Larvae in the tube, ALT is the number of alive larvae in the tube
